1 **SAMHD1 Impairs HIV-1 Gene Expression and Reactivation of Viral Latency in CD4<sup>+</sup> T-**  
2 **cells**

3  
4 Jenna M. Antonucci<sup>a,b,c</sup>, Sun Hee Kim<sup>a,b</sup>, Corine St. Gelais<sup>a,b</sup>, Serena Bonifati<sup>a,b</sup>, Olga  
5 Buzovetsky<sup>d</sup>, Kirsten M. Knecht<sup>d</sup>, Alice A. Duchon<sup>a,e,f,\*</sup>, Yong Xiong<sup>d</sup>, Karin Musier-Forsyth<sup>a,e,f</sup>,  
6 and Li Wu<sup>a,b,c,e,#</sup>

7  
8 **Running title:** SAMHD1 Impairs HIV-1 Gene Expression

9  
10 <sup>a</sup> Center for Retroviral Research, <sup>b</sup> Department of Veterinary Biosciences, <sup>c</sup> Department of  
11 Microbiology, <sup>e</sup> Center for RNA Biology, and <sup>f</sup> Department of Chemistry and Biochemistry, The  
12 Ohio State University, Columbus, Ohio, USA

13 <sup>d</sup> Department of Molecular Biophysics and Biochemistry, Yale University, New Haven,  
14 Connecticut, USA

15  
16 \* Present address: HIV Dynamics and Replication Program, National Cancer Institute, Frederick,  
17 Maryland, USA.

18  
19 # Address correspondence to: Li Wu, [wu.840@osu.edu](mailto:wu.840@osu.edu).

20  
21 **Word counts:** Abstract: 243 words; Importance: 149 words; Text: 5,456 words (excluding the  
22 references, figure legends and tables); Figures: 7; Tables: 2

23 **ABSTRACT**

24 Sterile alpha motif and HD domain-containing protein 1 (SAMHD1) restricts human  
25 immunodeficiency virus type 1 (HIV-1) replication in non-dividing cells by degrading  
26 intracellular deoxynucleoside triphosphates (dNTPs). SAMHD1 is highly expressed in resting  
27 CD4<sup>+</sup> T-cells that are important for the HIV-1 reservoir and viral latency; however, whether  
28 SAMHD1 affects HIV-1 latency is unknown. Recombinant SAMHD1 binds HIV-1 DNA or  
29 RNA fragments *in vitro*, but the function of this binding remains unclear. Here we investigate the  
30 effect of SAMHD1 on HIV-1 gene expression and reactivation of viral latency. We found that  
31 endogenous SAMHD1 impaired HIV-1 LTR activity in monocytic THP-1 cells and HIV-1  
32 reactivation in latently infected primary CD4<sup>+</sup> T-cells. Overexpression of wild-type (WT)  
33 SAMHD1 suppressed HIV-1 long terminal repeat (LTR)-driven gene expression at the level of  
34 transcription. SAMHD1 overexpression also suppressed LTR activity from human T-cell  
35 leukemia virus type 1 (HTLV-1), but not from murine leukemia virus (MLV), suggesting  
36 specific suppression of retroviral LTR-driven gene expression. WT SAMHD1 bound to proviral  
37 DNA and impaired reactivation of HIV-1 gene expression in latently infected J-Lat cells. In  
38 contrast, a nonphosphorylated mutant (T592A) and a dNTP triphosphohydrolase (dNTPase)  
39 inactive mutant (H206D/R207N, or HD/RN) of SAMHD1 failed to efficiently suppress HIV-1  
40 LTR-driven gene expression and reactivation of latent virus. Purified recombinant WT  
41 SAMHD1, but not T592A and HD/RN mutants, bound to fragments of the HIV-1 LTR *in vitro*.  
42 These findings suggest that SAMHD1-mediated suppression of HIV-1 LTR-driven gene  
43 expression contributes to regulation of viral latency in CD4<sup>+</sup> T-cells.

## 44 **IMPORTANCE**

45           A critical barrier to developing a cure for HIV-1 infection is the long-lived viral reservoir  
46 that exists in resting CD4<sup>+</sup> T-cells, the main targets of HIV-1. The viral reservoir is maintained  
47 through a variety of mechanisms, including regulation of the HIV-1 LTR promoter. The host  
48 protein SAMHD1 restricts HIV-1 replication in non-dividing cells, but its role in HIV-1 latency  
49 remains unknown. Here we report a new function of SAMHD1 in regulating HIV-1 latency. We  
50 found that SAMHD1 suppressed HIV-1 LTR promoter-driven gene expression and reactivation  
51 of viral latency in cell lines and primary CD4<sup>+</sup> T-cells. Furthermore, SAMHD1 bound to the  
52 HIV-1 LTR *in vitro* and in a latently infected CD4<sup>+</sup> T-cell line, suggesting that the binding may  
53 negatively modulate reactivation of HIV-1 latency. Our findings indicate a novel role for  
54 SAMHD1 in regulating HIV-1 latency, which enhances our understanding of the mechanisms  
55 regulating proviral gene expression in CD4<sup>+</sup> T-cells.

56  
57 **KEYWORDS:** HIV-1, SAMHD1, LTR, Gene expression, Latency, Reactivation.

## 58 59 **INTRODUCTION**

60           SAMHD1 is the only identified mammalian dNTPase (1, 2) with a well-characterized  
61 role in downregulation of intracellular dNTP levels (3), a mechanism by which SAMHD1 acts as  
62 a restriction factor against the infection of retroviruses (4, 5) and several DNA viruses (6-10) in  
63 non-dividing myeloid cells (11, 12) and quiescent CD4<sup>+</sup> T-cells (13, 14). Additionally, *in vitro*  
64 studies indicate that SAMHD1 is a single-stranded (ss) nucleic acid (NA) binding protein (15-  
65 18), although the function of this binding activity in cells remains unknown. One report

66 suggested that SAMHD1 uses its RNA binding potential to exert a ribonuclease activity against  
67 HIV-1 genomic RNA (19); however, recent studies do not support this observation (20-23).

68 SAMHD1 less efficiently restricts retroviral replication in dividing cells due to  
69 phosphorylation of SAMHD1 at Thr 592 (T592) (24-29). The dNTPase activity of SAMHD1  
70 requires the catalytic H206 and D207 residues of the HD domain (30, 31). While mutations to  
71 either H206 or D207 abrogated ssDNA binding *in vitro* (15), the effect of nonphosphorylated  
72 T592 on ssDNA binding has not been described. The binding of ssNA occurs at the dimer-dimer  
73 interface on free monomers and dimers of SAMHD1. This interaction prevents the formation of  
74 catalytically active tetramers (18), suggesting a dynamic mechanism where SAMHD1 may  
75 regulate its potent dNTPase activity through NA binding. However, the effect of SAMHD1 and  
76 NA binding on HIV-1 infection or viral gene expression is unknown.

77 HIV-1 latency occurs post-integration when a proviral reservoir is formed within a  
78 population of resting memory CD4<sup>+</sup> T-cells (32). By forming a stable reservoir and preventing  
79 immune clearance of infection, HIV-1 is able to persist in the host despite effective treatment  
80 with antiretroviral therapy (33). Although HIV-1 proviral DNA is transcriptionally silent in  
81 latently infected CD4<sup>+</sup> T-cells, reactivation of intact provirus can result in the production of  
82 infectious virions (34, 35). There are several mechanisms that contribute to HIV-1 latency,  
83 including sequestration of host transcription factors in the cytoplasm and transcriptional  
84 repression (32, 35). The 5' LTR promoter of HIV-1 proviral DNA contains several cellular  
85 transcription factor-binding sites, with transcription factors activated by external stimuli to  
86 enhance HIV-1 gene expression (36). Known cellular reservoirs of latent HIV-1 proviral DNA  
87 include quiescent CD4<sup>+</sup> T-cells and macrophages (37-39). Although HIV-1 does not  
88 productively replicate in resting CD4<sup>+</sup> T-cells, a stable state of latent infection does exist in these

89 cells (40, 41). SAMHD1 blocks reverse transcription leading to HIV-1 restriction in resting  
90 CD4<sup>+</sup> T-cells (13, 14); however, whether SAMHD1 affects reactivation of HIV-1 proviral DNA  
91 in latently infected CD4<sup>+</sup> T-cells remains unknown.

92 In this study, we demonstrate that SAMHD1 suppresses HIV-1 LTR-driven gene  
93 expression and binds to the LTR promoter in a latently infected cell line model. Furthermore,  
94 endogenous SAMHD1 suppresses HIV-1 LTR-driven gene expression in a monocytic THP-1  
95 cells and viral reactivation in latently infected primary CD4<sup>+</sup> T-cells. Our findings suggest that  
96 SAMHD1-mediated suppression of HIV-1 gene expression contributes to regulation of viral  
97 latency in primary CD4<sup>+</sup> T-cells, thereby identifying a novel role of SAMHD1 in modulating  
98 HIV-1 infection.

99

## 100 RESULTS

101 **Exogenous SAMHD1 expression suppresses HIV-1 LTR-driven gene expression in**  
102 **HEK293T cells.** Transcriptional activation of the HIV-1 provirus is regulated by interactions  
103 between the LTR promoter and several host and viral proteins (36). However, the effect of  
104 SAMHD1 expression on HIV-1 LTR-driven gene expression is unknown. To address this  
105 question, we performed an HIV-1 LTR-driven firefly luciferase (FF-luc) reporter assay using  
106 HEK293T cells. To examine transfection efficiency, a *Renilla* luciferase (Ren-luc) reporter  
107 driven by the herpes simplex virus (HSV) *thymidine kinase* (*TK*) promoter was used as a control  
108 (42). Expression of increasing levels of exogenous SAMHD1 did not change Ren-luc protein or  
109 mRNA expression (Fig. 1A-C), indicating comparable transfection efficiency among different  
110 samples, and that SAMHD1 overexpression did not affect *TK*-promoter driven gene expression.  
111 In contrast, when normalized with the Ren-luc control and compared to an empty vector,

112 SAMHD1 expression resulted in 70-85% suppression of FF-luc activity (Fig. 1D) and *FF-luc*  
113 mRNA levels (Fig. 1E) in a dose-dependent manner. These data suggest that exogenous  
114 SAMHD1 expression suppresses HIV-1 LTR-driven gene expression at the level of gene  
115 transcription.

116 **SAMHD1 silencing in THP-1 cells enhances HIV-1 LTR-driven gene expression.** To  
117 determine whether endogenous SAMHD1 can suppress LTR-driven gene expression in cells, we  
118 performed the HIV-1 LTR reporter assay using human monocytic THP-1 cells expressing a high  
119 level of endogenous SAMHD1 (Ctrl) and SAMHD1 knockout (KO) (29). THP-1 control or KO  
120 cells were nucleofected with plasmids expressing FF-luc and Ren-luc. The lack of SAMHD1  
121 expression in THP-1 KO cells was confirmed by immunoblotting (Fig. 1F). Consistent with the  
122 results from HEK293T cells, the Ren-luc activity was unchanged in THP-1 control and KO cells,  
123 confirming comparable transfection (Fig. 1G). When normalized with Ren-luc activity, KO cells  
124 showed a 4.5-fold increase of FF-Luc activity compared to control cells (Fig. 1H), indicating that  
125 endogenous SAMHD1 impairs HIV-1 LTR-driven gene expression in THP-1 cells.

126 **SAMHD1 suppresses gene expression driven by the LTR from HIV-1 and HTLV-1,**  
127 **but not from MLV.** To examine the specificity of SAMHD1-mediated suppression of LTR-  
128 driven gene expression, we tested luciferase reporters driven by LTR promoters derived from  
129 HTLV-1 or MLV LTR in addition to the HIV-1 LTR FF-luc reporter. The *TK* promoter-driven  
130 Ren-luc reporter was used as a transfection control. As HIV-1 and HTLV-1 utilize viral proteins  
131 Tat (43) and Tax (44) respectively, to enhance viral transcription via transactivation, we  
132 compared the ability of SAMHD1 to suppress HIV-1 and HTLV-1 LTR-driven gene expression  
133 with or without transactivation. Increased levels of exogenous SAMHD1 expression in  
134 transfected HEK293T cells were confirmed by immunoblotting (Fig. 2A, C, E). Although

135 SAMHD1 suppressed HIV-1 LTR-driven gene expression in the absence of Tat (Fig. 2B, black  
136 bars), Tat expression led to a 20 to 28-fold enhancement of HIV-1 LTR activity that was not  
137 suppressed by SAMHD1 (Fig. 2B, gray bars). Conversely, HTLV-1-LTR activity was potently  
138 suppressed by SAMHD1 expression, with up to 75% reduction in luciferase activity at the  
139 highest level of SAMHD1 expression in the presence or absence of Tat (Fig. 2D). SAMHD1  
140 expression had no effect on MLV-LTR activity (Fig. 2F). These data suggest that SAMHD1  
141 selectively suppresses retroviral LTR-driven gene expression.

142 **Nonphosphorylated and dNTPase-inactive SAMHD1 mutants have impaired**  
143 **suppression of HIV-1 LTR activity.** SAMHD1 is predominantly phosphorylated in HEK293T  
144 cells (25, 27). To assess the effect of dNTPase activity and T592 phosphorylation of SAMHD1  
145 on suppression of LTR-driven gene expression, we tested a catalytically inactive SAMHD1  
146 mutant HD/RN (30) and a nonphosphorylated T592A mutant (26). HEK293T cells were  
147 transfected with increasing amounts of plasmids encoding WT, T592A, or HD/RN mutant  
148 SAMHD1, along with the HIV-1 LTR-driven FF-luc reporter. Comparable WT and mutant  
149 SAMHD1 expression was confirmed by immunoblotting (Fig. 3A). Undetectable  
150 phosphorylation of the T592A mutant was confirmed in our previous studies (21). The *TK*  
151 promoter-driven Ren-luc reporter showed similar activity across all samples (Fig. 3B),  
152 confirming comparable transfection efficiency. Compared to the vector control and normalized  
153 with Ren-luc activity, WT SAMHD1 suppressed HIV-1 LTR-driven FF-luc expression up to  
154 60% in a dose-dependent manner (Fig. 3C). In contrast to WT SAMHD1, low amounts of  
155 HD/RN or T592A mutants (125 and 250 ng plasmid input) did not significantly inhibit HIV-1  
156 LTR activity. However, a modest inhibition of LTR-driven FF-luc activity (between 25-31%)  
157 was observed at the highest levels of mutant SAMHD1 expression (500 ng plasmid input) (Fig.

158 3C). These results indicated that T592A and HD/RN mutants have a diminished ability to  
159 suppress HIV-1 LTR-driven gene expression compared to WT SAMHD1, suggesting that  
160 SAMHD1-mediated suppression of HIV-1 gene expression is partially dependent on its dNTPase  
161 activity and T592 phosphorylation.

162 **WT SAMHD1 impairs HIV-1 reactivation in latently infected J-Lat cells.** To  
163 investigate whether SAMHD1 suppresses HIV-1 gene expression in CD4<sup>+</sup> T-cells, we used  
164 Jurkat CD4<sup>+</sup> T cell line-derived J-Lat cells (45). J-Lat cells have been used as an HIV-1 latency  
165 model, as they contain a full-length HIV-1 provirus with a *green fluorescent protein (gfp)* gene  
166 inserted in the *nef* region (45). Treatment of J-Lat cells with latency reversing agents (LRAs)  
167 results in activation of LTR-driven gene expression, indicated by an increase in GFP expression  
168 (45, 46). As J-Lat cells do not express detectable endogenous SAMHD1 protein, likely due to  
169 gene promoter methylation as reported in Jurkat cells (47), we stably expressed WT SAMHD1 in  
170 J-Lat cells by lentiviral transduction. Empty vector-transduced cells were used as a control.  
171 Previous studies showed that efficient SAMHD1 expression driven by the cytomegalovirus  
172 (CMV) immediate-early promoter of stably integrated lentiviral vector in monocytic cell lines is  
173 dependent on treatment of cells with phorbol 12-myristate 13-acetate (PMA) (4, 27), which is a  
174 protein C kinase agonist that activates the NF- $\kappa$ B signaling pathway (48, 49).

175 To activate HIV-1 gene expression in J-Lat cells we applied two LRAs, tumor necrosis  
176 factor alpha (TNF $\alpha$ ) which induces HIV-1 gene expression by activating the NF- $\kappa$ B pathway  
177 (46, 50, 51), and PMA in conjunction with ionomycin (PMA+i) that has been shown to be the  
178 strongest activator of HIV-1 gene expression in several J-Lat cell clones (46). Treatment of J-Lat  
179 cells with TNF $\alpha$  (Fig. 4A) resulted in GFP expression in 38% of vector control cells (Fig. 4B),  
180 consistent with published data (45, 46). In contrast, expression of WT SAMHD1 reduced TNF $\alpha$ -



181 induced GFP expression to 27% (Fig. 4B), suggesting that SAMHD1 impairs TNF $\alpha$ -induced  
182 HIV-1 reactivation. Treatment of WT SAMHD1-expressing J-Lat cells with PMA+i resulted in a  
183 significant increase in SAMHD1 expression (Fig. 4A) and a significant decrease in GFP-  
184 expression by 20% compared to vector control cells (Fig. 4B). While PMA+i treatment resulted  
185 in a 1.5-fold reduction of GFP mean fluorescence intensity (MFI) of SAMHD1-expressing cells  
186 compared to vector, the MFI of TNF $\alpha$ -treated cells was not significantly reduced by SAMHD1  
187 expression (Fig. 4B).

188 To examine whether increased SAMHD1 expression in J-Lat cells could more efficiently  
189 suppress HIV-1 reactivation, we compared J-Lat cells treated with two PMA+i concentrations  
190 with a 8-fold difference (Fig. 4C and 4D). To examine whether the dNTPase activity or T592  
191 phosphorylation of SAMHD1 affects its suppression of HIV-1 reactivation in J-Lat cells, we  
192 performed the analysis in J-Lat cells stably expressing WT SAMHD1, T592A, or HD/RN mutant  
193 by lentiviral transduction. Similar expression levels of WT SAMHD1 and the mutants were  
194 observed in 1 $\times$  PMA+i-treated cells, while 8 $\times$  PMA+i treatment highly increased the expression  
195 levels of WT SAMHD1, and mutant SAMHD1 to a lesser degree (Fig. 4C). WT SAMHD1-  
196 expressing cells had a 15% lower GFP-positive cell population compared to vector control cells  
197 at 1 $\times$  PMA+i; however, this was not further enhanced with increased WT SAMHD1 expression  
198 at 8 $\times$  PMA+i (Fig. 4D). While WT SAMHD1 suppressed HIV-1 reactivation at both 1 $\times$  and 8 $\times$   
199 PMA+i treatment, neither T592A nor HD/RN mutant had a suppression effect (Fig. 4D),  
200 suggesting that T592 phosphorylation and dNTPase activity of SAMHD1 are likely involved in  
201 reactivation of HIV-1 latency.

202 **WT SAMHD1 binds to HIV-1 LTR of proviral DNA in J-Lat cells.** One common  
203 mechanism by which host proteins modulate HIV-1 LTR activity is transcriptional repression by

204 directly binding to the promoter (52). SAMHD1 is a DNA binding protein (20) capable of  
205 interacting with *in vitro* transcribed HIV-1 *gag* DNA fragments (15). However, the interaction  
206 between SAMHD1 and integrated HIV-1 proviral DNA in cells has not been reported. To  
207 address this question, we performed a chromatin immunoprecipitation coupled with quantitative  
208 real-time PCR (ChIP-qPCR) experiment in J-Lat cells expressing WT, T592A, or HD/RN  
209 SAMHD1. To induce high levels of SAMHD1 for efficient immunoprecipitation (IP), we treated  
210 the cells with increased PMA+i concentrations. Treatment with 8× PMA+i allowed for  
211 maximum SAMHD1 expression without cell death (data not shown). However, WT SAMHD1  
212 expressed 20-30% greater than mutants under this condition (Fig. 4C). We treated the WT  
213 SAMHD1-expressing cells with 50% less PMA+i compared to that used for mutant-expressing  
214 cells, and obtained comparable levels of SAMHD1 (Fig. 5A). HIV-1 reactivation in all cell lines  
215 was measured by GFP expression (Fig. 5B). The WT SAMHD1-expressing J-Lat cells had a  
216 17% lower GFP-positive population compared to vector control, T592A, and HD/RN-expressing  
217 cells, which was reflected in a 1.6-fold lower MFI (Fig. 5B). After IP of WT or mutant  
218 SAMHD1 from cells treated with PMA+i (Fig. 5A), total bound DNA was eluted and quantified  
219 by qPCR. We used PCR primers specific for different regions in the HIV-1 genome, including  
220 the LTR, *gag*, *vpr*, and *rev* genes, to characterize the regions of interaction between SAMHD1  
221 and proviral DNA (Fig. 5C and Table 1). We also included *gfp*-specific PCR primers as an  
222 additional control, as *gfp* is a non-viral gene inserted in the *nef* gene of HIV-1 in J-Lat cells (45).  
223 We observed that only DNA fragments derived from the LTR (12% of input) bound to WT  
224 SAMHD1 (Fig. 5D). WT SAMHD1 did not bind other HIV-1 genes tested or the *gfp* gene. These  
225 data suggest that the SAMHD1-DNA interaction occurs in the LTR promoter region of HIV-1  
226 provirus. Interestingly, analysis of the DNA eluted from IP products of T592A and HD/RN

227 SAMHD1 revealed that neither mutant bound to tested HIV-1 DNA sequences or *gfp* cDNA  
228 (Fig. 5D). Taken together, these data indicate that mutant SAMHD1 cannot suppress latency  
229 reactivation or bind to proviral DNA, suggesting that direct binding to the HIV-1 LTR is  
230 partially responsible for the mechanism of SAMHD1-mediated suppression of LTR-driven gene  
231 expression.

232 **Purified recombinant WT SAMHD1 binds to HIV-1 LTR fragments *in vitro*.** To  
233 investigate the underlying mechanism of SAMHD1-mediated suppression of HIV-1 LTR activity  
234 and viral reactivation in cells, we determined whether this suppression effect correlated with  
235 SAMHD1 binding to HIV-1 LTR *in vitro*. Fluorescence anisotropy (FA) (53) was used to  
236 measure the binding of WT SAMHD1, T592A or HD/RN mutant to a 90-mer 5'-6-  
237 carboxyfluorescein (6-FAM)-labeled DNA oligonucleotide derived from the HIV-1 LTR (Table  
238 2). Binding was measured over a range of SAMHD1 concentrations and three monovalent ion  
239 concentrations (50, 100, and 150 mM) to determine whether the interaction is mediated by  
240 electrostatic interactions. While WT SAMHD1 binding to the HIV-1 LTR fragment was detected  
241 at all three salt concentrations tested, higher salt reduced the observed binding (Fig. 6A-C),  
242 which suggests that the interaction is mediated, at least in part, by electrostatic contacts. In  
243 contrast, no significant binding was observed for the T592A and HD/RN mutants even at the  
244 highest protein concentration (8,300 nM) (Fig. 6A-C). For WT SAMHD1, saturated or near-  
245 saturated binding was observed at 50 and 100 mM monovalent ions (Fig. 6A and 6B) with  
246 calculated apparent  $K_d$  values of  $93 \pm 8$  and  $242 \pm 51$  nM, respectively. Importantly, none of the  
247 SAMHD1 proteins bound to a 90-mer 6-FAM-labeled DNA oligonucleotide derived from a  
248 scrambled sequence of the HIV-1 LTR (Table 2), even at low (50 mM) monovalent ion

249 concentration (Fig. 6D). These data indicate that WT SAMHD1 binds specifically to HIV-1  
250 LTR-derived fragments in a salt sensitive manner.

251 **SAMHD1 knockdown promotes HIV-1 reactivation in latently infected primary**  
252 **CD4<sup>+</sup> T-cells.** To examine the effect of endogenous SAMHD1 on HIV-1 reactivation in primary  
253 CD4<sup>+</sup> T-cells, we utilized the established central memory T-cell (T<sub>CM</sub>) model of HIV-1 latency  
254 (40, 54) as depicted in the protocol in Fig. 7A. Using a *SAMHD1*-specific shRNA and  
255 established method (54, 55), we knocked down 40-50% of endogenous SAMHD1 expression in  
256 latently infected T<sub>CM</sub> derived from naïve CD4<sup>+</sup> T-cells isolated from three healthy donors (Fig.  
257 7B). Next, we activated latently infected GFP-reporter HIV-1 in T<sub>CM</sub> by CD3/CD28 antibody  
258 treatment and measured GFP expression as a readout of latency reactivation. As a negative  
259 control, T<sub>CM</sub> treated with media did not express GFP (1% background). Upon activation of  
260 latently infected T<sub>CM</sub>, partial knockdown of SAMHD1 enhanced HIV-1 reactivation by 1.6-fold  
261 compared to cells transduced with an empty shRNA vector, as measured by % GFP-positive cell  
262 population and MFI of GFP-positive cells (Fig. 7B and 7C). These results confirm that  
263 endogenous SAMHD1 acts as a negative regulator of HIV-1 reactivation in latently infected  
264 primary CD4<sup>+</sup> T-cells.

265

## 266 **DISCUSSION**

267 One of the hallmarks of HIV-1 persistence is the maintenance of a long-lived stable  
268 proviral reservoir that is formed after infection in resting CD4<sup>+</sup> T-cells (32, 56). Although the  
269 integrated provirus is transcriptionally silent, it is capable of full reactivation and production of  
270 infectious virus upon discontinuation of therapy or treatment with LRAs (32, 41, 56). In this

271 study, we tested the hypothesis that SAMHD1 plays a role in negatively regulating HIV-1  
272 reactivation and viral latency by suppressing HIV-1 LTR-driven gene expression.

273 We demonstrated that WT SAMHD1 suppresses HIV-1 LTR-driven gene expression, in  
274 the absence of Tat, in HEK293T and THP-1 cells. Previous work confirmed that SAMHD1 does  
275 not degrade HIV-1 genomic RNA or mRNA (20, 21), thereby excluding the possibility that  
276 mRNA degradation causes the suppression. We observed that SAMHD1 potently suppressed the  
277 HTLV-1 LTR independently of Tax expression but had no effect on the MLV LTR or HIV-1  
278 LTR in the presence of Tat. These differences in suppression could be the result of variations in  
279 transcriptional control of each LTR. Tat transactivation of the HIV-1 LTR occurs through direct  
280 binding of Tat to the HIV-1 transactivation-responsive region (43, 57). Tat transactivation may  
281 saturate LTR activity and mask a SAMHD1-mediated suppressive effect. The Tat-TAR binding  
282 affinity is particularly tight, with a  $K_d$  of 1-3 nM, making effective competition by SAMHD1  
283 very unlikely (43, 58). Moreover, we previously observed that SAMHD1 expression does not  
284 affect HIV-1 Gag expression from transfected HIV-1 proviral DNA where Tat is present (21).  
285 Conversely, Tax transactivation occurs through the mediation of interactions with host factors,  
286 specifically the CREB/CBP/p300 complex (44, 59, 60). Whether SAMHD1 interacts with host  
287 proteins to further suppress HTLV-1 LTR activity through disruption of Tax activity is unknown.  
288 As a simple retrovirus, MLV does not encode transactivation accessory proteins; however, its  
289 LTR has several binding sites for transcription factors, including nuclear factor 1 (61). Our data  
290 suggests that SAMHD1-mediated suppression of LTR activity may be specific for complex  
291 human retroviruses and could be influenced by certain transcription factors that bind to each  
292 respective LTR.

293 SAMHD1 enzyme activity can be regulated by mutations to its catalytic core or by post-  
294 translational modifications (62). Thus, we used two SAMHD1 mutants to determine the  
295 contribution of phosphorylation and dNTPase activity to the suppression of LTR-driven gene  
296 expression. The nonphosphorylated T592A mutant had reduced ability to suppress HIV-1 LTR-  
297 driven gene expression. Additionally, the dNTPase-inactive HD/RN mutant did not efficiently  
298 suppress HIV-1 LTR-driven gene expression. It is unlikely that a reduction in dNTP levels is  
299 required for the effect on LTR-driven gene expression as dNTP levels are high in HEK293T  
300 cells despite SAMHD1 overexpression (63). Interestingly, whereas WT SAMHD1 was observed  
301 to bind specifically to the HIV-1 LTR both in ChIP-qPCR and *in vitro* binding experiments, the  
302 SAMHD1 mutants failed to bind to the HIV-1 DNA regions tested. It is possible that SAMHD1  
303 oligomerization may play a role in the ability of SAMHD1 to bind DNA. Dimeric SAMHD1  
304 binds ssNA; however, previous reports have shown that tetramerization of SAMHD1 inhibits  
305 NA binding (18, 20). Phosphorylation of SAMHD1 at residue T592 destabilizes tetramer  
306 formation and impairs the dNTPase activity of SAMHD1 (64, 65), with binding of  
307 phosphomimetic T592E to ssRNA and ssDNA being identical to WT SAMHD1 (20). *In vitro*,  
308 the HD/RN mutant tetramerizes to a greater extent than WT SAMHD1 (66), and mutations of  
309 either H206 or D207 residues result in loss of ssDNA binding (15). It is possible that the T592A  
310 and HD/RN mutants form more stable tetramers and, as a consequence, lose the ability to bind  
311 the LTR and suppress activation. However, experiments to determine the oligomeric states of  
312 WT, T592A, and HD/RN SAMHD1 in the presence of fragments of the HIV-1 LTR can help to  
313 further test this possibility. Future studies are required to map the region of interaction between  
314 SAMHD1 and the HIV-1 LTR and to examine the contribution of binding to the suppression of  
315 LTR-driven gene expression. Together, our data suggests a mechanism for suppression of LTR

316 activity in which WT SAMHD1 is able to bind directly to the LTR and possibly occlude  
317 transcription factors required for LTR activity.

318 As suppression of the HIV-1 LTR is a common mechanism contributing to latency (52),  
319 we aimed to determine whether SAMHD1 affects latency reversal in cells. We utilized two HIV-  
320 1 latency cell models, the J-Lat cell line and primary T<sub>CM</sub> cells (40, 45, 54, 55, 67). In both  
321 models, SAMHD1 expression resulted in a suppression of latency reactivation. The modest  
322 effect observed could be due to saturation of the NF- $\kappa$ B pathway by PMA and TNF $\alpha$  (Fig. 4) or  
323 anti-CD3/CD28 (Fig. 7), as significant activation of the LTR may mask the suppressive effect of  
324 SAMHD1 (46, 50, 68, 69).

325 In summary, our data indicate a correlation between SAMHD1 binding to the HIV-1 LTR  
326 and SAMHD1-mediated suppression of viral gene expression and reactivation of HIV-1 latency,  
327 suggesting that SAMHD1 is among the host proteins involved in the transcriptional regulation of  
328 proviral DNA. Our results further implicate that the T592 and H206/D207 residues of SAMHD1  
329 are important for LTR binding and suppression of HIV-1 gene expression. Future studies using  
330 latently infected cells from HIV-1 patients and primary HIV-1 isolates will further inform the  
331 function and mechanisms of SAMHD1 as a novel modulator of HIV-1 latency.

332

## 333 **MATERIALS AND METHODS**

334 **Cell culture.** Human embryonic kidney 293T (HEK293T) cells were obtained from the  
335 American Type Culture Collection (ATCC) and maintained as described (27). Jurkat cell-derived  
336 J-Lat cells (clone 9.2) were obtained from the NIH AIDS reagent program and maintained as  
337 described (45). THP-1 control cells and derived SAMHD1 KO cells were maintained as  
338 described (29). All cell lines tested negative for mycoplasma contamination using a PCR-based

339 universal mycoplasma detection kit (ATCC, #30-101-2k). Healthy human donors' peripheral  
340 blood mononuclear cells (PBMCs) were isolated from the buffy coat as previously described  
341 (70). Naïve CD4<sup>+</sup> T-cells were isolated from PBMCs by MACS microbead-negative sorting and  
342 the naïve CD4<sup>+</sup> T-cell isolation kit (Miltenyi Biotec). Primary CD4<sup>+</sup> T-cells were cultured in  
343 complete RPMI-1640 media in the presence of 30 IU/mL of recombinant interleukin 2 (rIL-2)  
344 (Obtained from the NIH AIDS Research and Reference Reagent Program, catalog number 136)  
345 (27).

346 **Plasmids.** The pLenti-puro vectors encoding hemagglutinin (HA)-tagged WT SAMHD1  
347 (driven by the CMV immediate-early promoter) and the empty vector were described (4) and  
348 provided by Nathaniel Landau (New York University). The pLenti-puro vector expressing HA-  
349 tagged T592A and HD/RN SAMHD1 mutant constructs were generated using a Quikchange  
350 mutagenesis kit (Agilent Technologies) (27). The HTLV-1-LTR luciferase reporter plasmid and  
351 pcTax were provided by Patrick Green (The Ohio State University) (71). The HIV-1 FF-luc  
352 (pGL3-LTR-luc) was provided by Jian-Hua Wang (Pasteur Institute of Shanghai) (55). The  
353 pRenilla-TK plasmid was provided by Kathleen Boris-Lawrie (University of Minnesota). The  
354 pTat plasmid is a pcDNA3-based HIV-1 Tat expression construct (72) provided by Vineet  
355 KewalRamani (National Cancer Institute). The MLV-LTR reporter (pFB-Luc) contains the MLV  
356 5' LTR, truncated *gag*, 3' LTR, and *firefly luciferase*, which was provided by Vineet  
357 KewalRamani (National Cancer Institute).

358 **Transfection assays.** HEK293T cells ( $5.0 \times 10^4$  in experiments of Fig. 1 and  $1.0 \times 10^5$  in  
359 experiments of Fig. 2-3) were co-transfected with a viral LTR-driven luciferase construct (HIV-  
360 1, HTLV-1, or MLV), TK-driven Renilla luciferase construct, and increasing amounts of  
361 SAMHD1 WT, T592A or HD/RN mutant-expressing plasmid using calcium phosphate as



362 described (27). The total amount of DNA transfected was maintained through addition of empty  
363 vector. Transfection media was replaced with fresh media at 16 h after transfection.  
364 Nucleofection of control and SAMHD1 KO THP-1 cells with HIV-1-LTR-Luc and TK-Renilla  
365 was performed using the Amaxa Cell Line Nucleofector Kit V (Lonza).

366 **Immunoblotting and antibodies.** Cells were harvested 24 h after transfection or as  
367 specifically indicated, washed with phosphate-buffered saline (PBS) and lysed with cell lysis  
368 buffer (Cell Signaling, #9803) containing protease inhibitor cocktail (Sigma-Aldrich P8340).  
369 Cell lysates were prepared for immunoblotting as described (27). HA-tagged SAMHD1 and  
370 endogenous glyceraldehyde-3-phosphate dehydrogenase (GAPDH) were detected using  
371 antibodies specific to HA (Covance, Ha.11 clone 16B12) at a 1:1,000 dilution, and GAPDH  
372 (BioRad, AHP1628) at a 1:3,000 dilution, respectively. Polyclonal SAMHD1-specific antibodies  
373 (Abcam, ab67820) were used at a 1:1,000 dilution for immunoblotting, as described (63).  
374 Immunoblots were imaged and analyzed using the Amersham imager 600 (GE Healthcare).  
375 Validation for all antibodies is provided on the manufacturers' websites.

376 **Densitometry quantification of immunoblots.** Densitometry analysis was performed on  
377 unaltered low-exposure images using the ImageJ software. Densitometry values were normalized  
378 to GAPDH.

379 **Protein expression and purification.** Full-length cDNA of WT, T592A, and HD/RN  
380 SAMHD1 were cloned into a pET28a expression vector with a 6 × His-tag at the N- terminus  
381 and expressed in *E. coli*. SAMHD1 proteins were purified using a nickel-nitrilotriacetic acid  
382 affinity column as described (73). The eluted peak fractions were collected and dialyzed into the  
383 assay buffer, and then further purified with size-exclusion chromatography as described (21).

384 SAMHD1 protein was stored in buffer containing 50 mM Tris-HCL (pH 8.0), 150 mM NaCl, 5  
385 mM MgCl<sub>2</sub>, 0.5 mM Tris-(2-carboxyethyl) phosphine at -80 °C.

386 **Synthetic DNA oligonucleotides.** Oligonucleotides used in FA binding assays, and as  
387 primers for qPCR, were synthesized by Integrated DNA Technologies. Sequences of  
388 oligonucleotides and primers are shown in Tables 1 and 2. A 90-mer 6-FAM-labeled DNA  
389 oligonucleotide derived from the scrambled sequence of the HIV-1 LTR was obtained using the  
390 Sequence Manipulation Suite (Bioinformatics.org).

391 **FA binding assays.** The assays were performed as described (53, 74) using 5'-6-FAM-  
392 labeled DNA sequences shown in Table 2. Briefly, proteins were incubated with 10 nM DNA at  
393 room temperature for 30 min in 20 mM Tris-HCl, pH 8, 1 mM MgCl<sub>2</sub>, 0.25 mM HEPES, 50 μM  
394 2-mercaptoethanol, and 50, 100, or 150 mM monovalent ions (25, 50, or 75 mM of each NaCl  
395 and KCl). Each measurement was performed in triplicate over a range of WT or mutant  
396 SAMHD1 (5-8,300 nM). Binding affinities were calculated by fitting the data to a 1:1 binding  
397 model, as described (75). Fluorescence measurements were obtained using a SpectraMax M5  
398 plate reader (Molecular Devices, Sunnyvale, CA).

399 **Generation of SAMHD1-expressing J-Lat cell lines.** HEK293T cells were transfected  
400 with pLenti-puro vector or HA-tagged SAMHD1 (WT, T592A, and HD/RN) expressing  
401 plasmids, pMDL packaging construct, pVSV-G, and pRSV-rev to produce lentiviral stocks for  
402 spinoculation at 2,000 × g for 2 h at room temperature. Lentiviral stocks were harvested, filtered,  
403 and concentrated through a sucrose cushion at 48 h post transfection. Concentrated lentivirus  
404 stock was resuspended in RPMI-1640 media and applied to J-Lat cells (clone 9.2) with  
405 polybrene (8 μg/mL) prior to spinoculation. Afterwards, cells were cultured in complete RPMI  
406 media for 72 h before undergoing selection with 0.8 μg/mL puromycin.

407           **HIV-1 reactivation assay in J-Lat cells.** J-Lat cells (clone 9.2) stably expressing WT,  
408 mutant T592A or HD/RN SAMHD1 were generated as described above. Cells were treated with  
409 10 ng/mL TNF $\alpha$ , or 32 nM PMA with 1  $\mu$ M ionomycin (2 $\times$  PMA+i) unless otherwise described  
410 in figure legends. At 24 h post-treatment, media was removed and cells were washed and placed  
411 in untreated complete RPMI-1640 media for an additional 12 h. Cells were collected, washed  
412 twice with 1 $\times$  PBS, and suspended in 2% fetal bovine serum in PBS. Cells were evaluated by  
413 flow cytometry using Guava EasyCyte Mini Flow Cytometer (Millipore), with data analyzed by  
414 FlowJo software.

415           **IP of SAMHD1 in J-Lat cells.** J-Lat cells (clone 9.2) expressing WT or mutant  
416 SAMHD1 and the vector control cells were differentiated using either 64 nM PMA (WT) or 128  
417 nM PMA (vector, T592A, and HD/RN) for 24 h. At 36 h post-treatment, cells were treated with  
418 1% paraformaldehyde for 10 min before the reaction was quenched with 0.125 M glycine. Cells  
419 were lysed in non-SDS containing radioimmunoprecipitation assay buffer and sonicated to shear  
420 cellular chromatin. Monoclonal anti-HA-agarose beads were incubated with 250  $\mu$ g of cell lysate  
421 from SAMHD1-expressing (WT, T592A, HD/RN) or vector control cells at 4 $^{\circ}$ C for 2 h. Beads  
422 were washed 3 times with PBS containing 0.1% Tween. To confirm IP efficiency, bound  
423 proteins were eluted from beads by boiling in 1 $\times$  SDS-sample buffer, and the supernatants were  
424 analyzed by immunoblot as described (27). Total DNA was isolated from proteinase-K treated  
425 sonicated input lysate and IP products using a DNeasy kit (Qiagen).

426           **qPCR assay.** For quantification of *Renilla* or *firefly luciferase* mRNA in transfected  
427 HEK293T cells, total cellular RNA was extracted using the RNeasy mini kit (Qiagen). Equal  
428 amounts of total RNA from each sample were used as a template for first-strand cDNA synthesis  
429 using Superscript III first-strand synthesis system and oligo (dT) primers (Thermo Fisher

430 Scientific). SYBR green-based PCR analysis was performed using specific primers detailed in  
431 Table 1 and methods described (63). Quantification of spliced *GAPDH* mRNA was used for  
432 normalization as described (63). Calculation of relative gene expression was performed using the  
433  $2^{-\Delta\Delta CT}$  method as described (76).

434 The levels of SAMHD1-bound HIV-1 genomic DNA from PMA-treated latently infected  
435 J-Lat cells were measured by SYBR-green-based qPCR using primers detailed in Table 1 and  
436 methods as described (63, 77). DNA samples without primer templates were used as negative  
437 controls. Genomic DNA (50 ng) from PMA-treated SAMHD1-expressing or vector control J-Lat  
438 cells after IP was used as input for the detection of HIV-1 genes. Data was normalized to vector  
439 background levels and presented as percent of total input DNA.

440 **Generation of shRNA vectors.** HEK293T cells were transfected with pLKO.1-puro  
441 empty vector (GE DHarmacon) and SAMHD1-specific shRNA expressing plasmids (GE  
442 DHarmacon, clone ID: TRCN0000145408), psPAX2 packaging construct, and vesicular  
443 stomatitis virus G-protein-expressing construct (pVSV-G) to produce lentiviral stocks for  
444 spinoculation at  $2,000 \times g$  for 2 h at room temperature. Lentiviral stocks were harvested, filtered,  
445 and concentrated through a sucrose cushion at 48 h post transfection. Concentrated lentivirus  
446 stock was resuspended in RPMI-1640 media and applied to isolated naïve  $CD4^+$  T-cells with  
447 polybrene (8  $\mu\text{g/mL}$ ) prior to spinoculation. Afterwards, cells were cultured in complete RPMI-  
448 1640 media with 30 IU/mL of IL-2.

449 **HIV-1 latency reactivation assay in primary  $T_{CM}$  cells.** We utilized the primary  $T_{CM}$   
450 model of latency as described (54, 55). In brief, naïve  $CD4^+$  T-cells cells were stimulated for 72  
451 h with anti-CD3/CD28-antibody coated magnetic beads (Dynabeads). After an additional 4 days  
452 of culture, cells were infected with VSV-G-pseudotyped HIV-1-GFP (40) and cultured for 7 days

453 to produce latently infected T<sub>CM</sub>. Next, cells were transduced with lentiviral vectors containing  
454 vector control or SAMHD1 shRNA for 3 days before activation with or without anti-CD3/CD28  
455 antibody-coated magnetic beads for 3 days. HIV-1 reactivation was measured by flow cytometry.

456

## 457 **ACKNOWLEDGMENTS**

458 We thank Kathleen Boris-Lawrie, Patrick Green, Vineet KewalRamani, Baek Kim,  
459 Nathaniel Landau, Vicente Planelles, and Jian-Hua Wang for sharing reagents, and members of  
460 the Wu and Musier-Forsyth labs for valuable discussions. The following reagents were obtained  
461 through the NIH AIDS Reagent Program, Division of AIDS, NIAID, NIH: J-Lat Full Length  
462 GFP Cells (clone 9.2) from Dr. Eric Verdin, and human rIL-2 from Dr. Maurice Gately,  
463 Hoffmann - La Roche Inc.

464 This work was supported by NIH grants R01 AI104483, R01 AI120209, and R01  
465 GM128212 to L.W., NIH grant R01 GM113887 to K.M.-F., C. Glenn Barber funds from the  
466 College of Veterinary Medicine at the Ohio State University (OSU) to J.M.A., NIH F31  
467 GM119178 and a fellowship from the Center for RNA Biology at OSU to A.A.D., NIH T32  
468 GM007223 and the National Science Foundation Graduate Research Fellowship to O.B., and  
469 NIH T32 GM008283 to K.M.K.

470 L.W. conceived the study and designed experiments with J.M.A. and C.S.G. J.M.A.  
471 S.H.K. and S.B. performed the experiments. O.B. and K.M.K. purified recombinant SAMHD1  
472 proteins. J.M.A., C.S.G, A.A.D., K.M.F., Y.X., C.S.G., and L.W. analyzed data. J.M.A. and  
473 L.W. wrote the manuscript. All authors reviewed the results, revised manuscript, and approved  
474 the final version of the manuscript. All the authors declare that there are no conflicts of interest.

475

476

## 477 REFERENCES

- 478 1. Powell RD, Holland PJ, Hollis T, Perrino FW. 2011. Aicardi-Goutieres syndrome gene  
479 and HIV-1 restriction factor SAMHD1 is a dGTP-regulated deoxynucleotide  
480 triphosphohydrolase. *J Biol Chem* 286:43596-600.
- 481 2. Goldstone DC, Ennis-Adeniran V, Hedden JJ, Groom HC, Rice GI, Christodoulou E,  
482 Walker PA, Kelly G, Haire LF, Yap MW, de Carvalho LP, Stoye JP, Crow YJ, Taylor  
483 IA, Webb M. 2011. HIV-1 restriction factor SAMHD1 is a deoxynucleoside triphosphate  
484 triphosphohydrolase. *Nature* 480:379-82.
- 485 3. Franzolin E, Pontarin G, Rampazzo C, Miazzi C, Ferraro P, Palumbo E, Reichard P,  
486 Bianchi V. 2013. The deoxynucleotide triphosphohydrolase SAMHD1 is a major  
487 regulator of DNA precursor pools in mammalian cells. *Proc Natl Acad Sci U S A*  
488 110:14272-7.
- 489 4. Lahouassa H, Daddacha W, Hofmann H, Ayinde D, Logue EC, Dragin L, Bloch N,  
490 Maudet C, Bertrand M, Gramberg T, Pancino G, Priet S, Canard B, Laguette N,  
491 Benkirane M, Transy C, Landau NR, Kim B, Margottin-Goguet F. 2012. SAMHD1  
492 restricts the replication of human immunodeficiency virus type 1 by depleting the  
493 intracellular pool of deoxynucleoside triphosphates. *Nat Immunol* 13:223-228.
- 494 5. Gramberg T, Kahle T, Bloch N, Wittmann S, Mullers E, Daddacha W, Hofmann H, Kim  
495 B, Lindemann D, Landau NR. 2013. Restriction of diverse retroviruses by SAMHD1.  
496 *Retrovirology* 10:26.
- 497 6. Kim ET, White TE, Brandariz-Núñez A, Diaz-Griffero F, Weitzman MD. 2013.  
498 SAMHD1 restricts herpes simplex virus 1 in macrophages by limiting DNA replication. *J*  
499 *Virol* 87:12949-56.
- 500 7. Hollenbaugh JA, Gee P, Baker J, Daly MB, Amie SM, Tate J, Kasai N, Kanemura Y,  
501 Kim DH, Ward BM, Koyanagi Y, Kim B. 2013. Host factor SAMHD1 restricts DNA  
502 viruses in non-dividing myeloid cells. *PLoS Pathog* 9:e1003481.
- 503 8. Chen Z, Zhu M, Pan X, Zhu Y, Yan H, Jiang T, Shen Y, Dong X, Zheng N, Lu J, Ying S.  
504 2014. Inhibition of Hepatitis B virus replication by SAMHD1. *Biochem Biophys Res*  
505 *Commun* 450:1462-8.
- 506 9. Jeong GU, Park IH, Ahn K, Ahn BY. 2016. Inhibition of hepatitis B virus replication by  
507 a dNTPase-dependent function of the host restriction factor SAMHD1. *Virology* 495:71-  
508 8.
- 509 10. Sommer AF, Rivière L, Qu B, Schott K, Riess M, Ni Y, Shepard C, Schnellbacher E,  
510 Finkernagel M, Himmelsbach K, Welzel K, Ketterer N, Donnerhak C, Münk C, Flory E,  
511 Liese J, Kim B, Urban S, König R. 2016. Restrictive influence of SAMHD1 on Hepatitis  
512 B Virus life cycle. *Sci Rep* 6:26616.
- 513 11. Laguette N, Sobhian B, Casartelli N, Ringeard M, Chable-Bessia C, Ségéral E, Yatim A,  
514 Emiliani S, Schwartz O, Benkirane M. 2011. SAMHD1 is the dendritic- and myeloid-  
515 cell-specific HIV-1 restriction factor counteracted by Vpx. *Nature* 474:654-7.
- 516 12. Hrecka K, Hao C, Gierszewska M, Swanson SK, Kesik-Brodacka M, Srivastava S,  
517 Florens L, Washburn MP, Skowronski J. 2011. Vpx relieves inhibition of HIV-1  
518 infection of macrophages mediated by the SAMHD1 protein. *Nature* 474:658-61.



- 519 13. Descours B, Cribier A, Chable-Bessia C, Ayinde D, Rice G, Crow Y, Yatim A, Schwartz  
520 O, Laguette N, Benkirane M. 2012. SAMHD1 restricts HIV-1 reverse transcription in  
521 quiescent CD4(+) T-cells. *Retrovirology* 9:87.
- 522 14. Baldauf HM, Pan X, Erikson E, Schmidt S, Daddacha W, Burggraf M, Schenkova K,  
523 Ambiel I, Wabnitz G, Gramberg T, Panitz S, Flory E, Landau NR, Sertel S, Rutsch F,  
524 Lasitschka F, Kim B, Konig R, Fackler OT, Keppler OT. 2012. SAMHD1 restricts HIV-1  
525 infection in resting CD4(+) T cells. *Nat Med* 18:1682-7.
- 526 15. Beloglazova N, Flick R, Tchigvintsev A, Brown G, Popovic A, Nocek B, Yakunin AF.  
527 2013. Nuclease activity of the human SAMHD1 protein implicated in the Aicardi-  
528 Goutieres syndrome and HIV-1 restriction. *J Biol Chem* 288:8101-10.
- 529 16. Tüngler V, Staroske W, Kind B, Dobrick M, Kretschmer S, Schmidt F, Krug C, Lorenz  
530 M, Chara O, Schwille P, Lee-Kirsch MA. 2013. Single-stranded nucleic acids promote  
531 SAMHD1 complex formation. *J Mol Med (Berl)* 91:759-70.
- 532 17. Goncalves A, Karayel E, Rice GI, Bennett KL, Crow YJ, Superti-Furga G,  
533 Bürckstümmer T. 2012. SAMHD1 is a nucleic-acid binding protein that is mislocalized  
534 due to aicardi-goutières syndrome-associated mutations. *Hum Mutat* 33:1116-22.
- 535 18. Seamon KJ, Bumpus NN, Stivers JT. 2016. Single-Stranded Nucleic Acids Bind to the  
536 Tetramer Interface of SAMHD1 and Prevent Formation of the Catalytic Homotetramer.  
537 *Biochemistry* 55:6087-6099.
- 538 19. Ryoo J, Choi J, Oh C, Kim S, Seo M, Kim SY, Seo D, Kim J, White TE, Brandariz-  
539 Nuñez A, Diaz-Griffero F, Yun CH, Hollenbaugh JA, Kim B, Baek D, Ahn K. 2014. The  
540 ribonuclease activity of SAMHD1 is required for HIV-1 restriction. *Nat Med* 20:936-41.
- 541 20. Seamon KJ, Sun Z, Shlyakhtenko LS, Lyubchenko YL, Stivers JT. 2015. SAMHD1 is a  
542 single-stranded nucleic acid binding protein with no active site-associated nuclease  
543 activity. *Nucleic Acids Res* 43:6486-99.
- 544 21. Antonucci JM, St Gelais C, de Silva S, Yount JS, Tang C, Ji X, Shepard C, Xiong Y,  
545 Kim B, Wu L. 2016. SAMHD1-mediated HIV-1 restriction in cells does not involve  
546 ribonuclease activity. *Nat Med* 22:1072-1074.
- 547 22. Wittmann S, Behrendt R, Eissmann K, Volkmann B, Thomas D, Ebert T, Cribier A,  
548 Benkirane M, Hornung V, Bouzas NF, Gramberg T. 2015. Phosphorylation of murine  
549 SAMHD1 regulates its antiretroviral activity. *Retrovirology* 12:103.
- 550 23. Antonucci JM, St Gelais C, Wu L. 2017. The Dynamic Interplay between HIV-1,  
551 SAMHD1, and the Innate Antiviral Response. *Front Immunol* 8:1541.
- 552 24. Cribier A, Descours B, Valadao AL, Laguette N, Benkirane M. 2013. Phosphorylation of  
553 SAMHD1 by cyclin A2/CDK1 regulates its restriction activity toward HIV-1. *Cell Rep*  
554 3:1036-43.
- 555 25. White TE, Brandariz-Nunez A, Valle-Casuso JC, Amie S, Nguyen LA, Kim B, Tuzova  
556 M, Diaz-Griffero F. 2013. The retroviral restriction ability of SAMHD1, but not its  
557 deoxynucleotide triphosphohydrolase activity, is regulated by phosphorylation. *Cell Host*  
558 *Microbe* 13:441-51.
- 559 26. Welbourn S, Dutta SM, Semmes OJ, Strebel K. 2013. Restriction of virus infection but  
560 not catalytic dNTPase activity is regulated by phosphorylation of SAMHD1. *J Virol*  
561 87:11516-24.
- 562 27. St Gelais C, de Silva S, Hach JC, White TE, Diaz-Griffero F, Yount JS, Wu L. 2014.  
563 Identification of cellular proteins interacting with the retroviral restriction factor  
564 SAMHD1. *J Virol* 88:5834-44.

- 565 28. Wang F, St Gelais C, de Silva S, Zhang H, Geng Y, Shepard C, Kim B, Yount JS, Wu L.  
566 2016. Phosphorylation of mouse SAMHD1 regulates its restriction of human  
567 immunodeficiency virus type 1 infection, but not murine leukemia virus infection.  
568 *Virology* 487:273-84.
- 569 29. Bonifati S, Daly MB, St Gelais C, Kim SH, Hollenbaugh JA, Shepard C, Kennedy EM,  
570 Kim DH, Schinazi RF, Kim B, Wu L. 2016. SAMHD1 controls cell cycle status,  
571 apoptosis and HIV-1 infection in monocytic THP-1 cells. *Virology* 495:92-100.
- 572 30. White TE, Brandariz-Nuñez A, Valle-Casuso JC, Amie S, Nguyen L, Kim B, Brojatsch J,  
573 Diaz-Griffero F. 2013. Contribution of SAM and HD domains to retroviral restriction  
574 mediated by human SAMHD1. *Virology* 436:81-90.
- 575 31. Ji X, Wu Y, Yan J, Mehrens J, Yang H, DeLucia M, Hao C, Gronenborn AM,  
576 Skowronski J, Ahn J, Xiong Y. 2013. Mechanism of allosteric activation of SAMHD1 by  
577 dGTP. *Nat Struct Mol Biol* 20:1304-9.
- 578 32. Ruelas DS, Greene WC. 2013. An integrated overview of HIV-1 latency. *Cell* 155:519-  
579 29.
- 580 33. Richman DD, Margolis DM, Delaney M, Greene WC, Hazuda D, Pomerantz RJ. 2009.  
581 The challenge of finding a cure for HIV infection. *Science* 323:1304-7.
- 582 34. Shan L, Yang HC, Rabi SA, Bravo HC, Shroff NS, Irizarry RA, Zhang H, Margolick JB,  
583 Siliciano JD, Siliciano RF. 2011. Influence of host gene transcription level and  
584 orientation on HIV-1 latency in a primary-cell model. *J Virol* 85:5384-93.
- 585 35. Margolis DM, Garcia JV, Hazuda DJ, Haynes BF. 2016. Latency reversal and viral  
586 clearance to cure HIV-1. *Science* 353:aaf6517.
- 587 36. Van Lint C, Bouchat S, Marcello A. 2013. HIV-1 transcription and latency: an update.  
588 *Retrovirology* 10:67.
- 589 37. Araínga M, Edagwa B, Mosley RL, Poluektova LY, Gorantla S, Gendelman HE. 2017. A  
590 mature macrophage is a principal HIV-1 cellular reservoir in humanized mice after  
591 treatment with long acting antiretroviral therapy. *Retrovirology* 14:17.
- 592 38. Abbas W, Tariq M, Iqbal M, Kumar A, Herbein G. 2015. Eradication of HIV-1 from the  
593 macrophage reservoir: an uncertain goal? *Viruses* 7:1578-98.
- 594 39. Kumar A, Abbas W, Herbein G. 2014. HIV-1 latency in monocytes/macrophages.  
595 *Viruses* 6:1837-60.
- 596 40. Bosque A, Planelles V. 2009. Induction of HIV-1 latency and reactivation in primary  
597 memory CD4+ T cells. *Blood* 113:58-65.
- 598 41. Finzi D, Hermankova M, Pierson T, Carruth LM, Buck C, Chaisson RE, Quinn TC,  
599 Chadwick K, Margolick J, Brookmeyer R, Gallant J, Markowitz M, Ho DD, Richman  
600 DD, Siliciano RF. 1997. Identification of a reservoir for HIV-1 in patients on highly  
601 active antiretroviral therapy. *Science* 278:1295-300.
- 602 42. Shifera AS, Hardin JA. 2010. Factors modulating expression of Renilla luciferase from  
603 control plasmids used in luciferase reporter gene assays. *Anal Biochem* 396:167-72.
- 604 43. Rosen CA, Pavlakis GN. 1990. Tat and Rev: positive regulators of HIV gene expression.  
605 *AIDS* 4:A51.
- 606 44. Andresen V, Pise-Masison CA, Sinha-Datta U, Bellon M, Valeri V, Washington Parks R,  
607 Cecchinato V, Fukumoto R, Nicot C, Franchini G. 2011. Suppression of HTLV-1  
608 replication by Tax-mediated rerouting of the p13 viral protein to nuclear speckles. *Blood*  
609 118:1549-59.



- 610 45. Jordan A, Bisgrove D, Verdin E. 2003. HIV reproducibly establishes a latent infection  
611 after acute infection of T cells in vitro. *EMBO J* 22:1868-77.
- 612 46. Spina CA, Anderson J, Archin NM, Bosque A, Chan J, Famiglietti M, Greene WC,  
613 Kashuba A, Lewin SR, Margolis DM, Mau M, Ruelas D, Saleh S, Shirakawa K, Siliciano  
614 RF, Singhanian A, Soto PC, Terry VH, Verdin E, Woelk C, Wooden S, Xing S, Planelles  
615 V. 2013. An in-depth comparison of latent HIV-1 reactivation in multiple cell model  
616 systems and resting CD4<sup>+</sup> T cells from aviremic patients. *PLoS Pathog* 9:e1003834.
- 617 47. de Silva S, Hoy H, Hake TS, Wong HK, Porcu P, Wu L. 2013. Promoter methylation  
618 regulates SAMHD1 gene expression in human CD4<sup>+</sup> T cells. *J Biol Chem* 288:9284-92.
- 619 48. Wolf M, LeVine H, May WS, Cuatrecasas P, Sahyoun N. 1985. A model for intracellular  
620 translocation of protein kinase C involving synergism between Ca<sup>2+</sup> and phorbol esters.  
621 *Nature* 317:546-9.
- 622 49. Blumberg PM. 1988. Protein kinase C as the receptor for the phorbol ester tumor  
623 promoters: sixth Rhoads memorial award lecture. *Cancer Res* 48:1-8.
- 624 50. Folks TM, Clouse KA, Justement J, Rabson A, Duh E, Kehrl JH, Fauci AS. 1989. Tumor  
625 necrosis factor alpha induces expression of human immunodeficiency virus in a  
626 chronically infected T-cell clone. *Proc Natl Acad Sci U S A* 86:2365-8.
- 627 51. Duh EJ, Maury WJ, Folks TM, Fauci AS, Rabson AB. 1989. Tumor necrosis factor alpha  
628 activates human immunodeficiency virus type 1 through induction of nuclear factor  
629 binding to the NF-kappa B sites in the long terminal repeat. *Proc Natl Acad Sci U S A*  
630 86:5974-8.
- 631 52. Siliciano RF, Greene WC. 2011. HIV latency. *Cold Spring Harb Perspect Med*  
632 1:a007096.
- 633 53. Rye-McCurdy T, Rouzina I, Musier-Forsyth K. 2015. Fluorescence anisotropy-based  
634 salt-titration approach to characterize protein-nucleic acid interactions. *Methods Mol Biol*  
635 1259:385-402.
- 636 54. Bosque A, Planelles V. 2011. Studies of HIV-1 latency in an ex vivo model that uses  
637 primary central memory T cells. *Methods* 53:54-61.
- 638 55. Li C, Wang HB, Kuang WD, Ren XX, Song ST, Zhu HZ, Li Q, Xu LR, Guo HJ, Wu L,  
639 Wang JH. 2017. Naf1 Regulates HIV-1 Latency by Suppressing Viral Promoter-Driven  
640 Gene Expression in Primary CD4<sup>+</sup> T Cells. *J Virol* 91:01830-16.
- 641 56. Finzi D, Blankson J, Siliciano JD, Margolick JB, Chadwick K, Pierson T, Smith K,  
642 Lisziewicz J, Lori F, Flexner C, Quinn TC, Chaisson RE, Rosenberg E, Walker B, Gange  
643 S, Gallant J, Siliciano RF. 1999. Latent infection of CD4<sup>+</sup> T cells provides a mechanism  
644 for lifelong persistence of HIV-1, even in patients on effective combination therapy. *Nat*  
645 *Med* 5:512-7.
- 646 57. Taube R, Fujinaga K, Wimmer J, Barboric M, Peterlin BM. 1999. Tat transactivation: a  
647 model for the regulation of eukaryotic transcriptional elongation. *Virology* 264:245-53.
- 648 58. Karn J, Dingwall C, Finch JT, Heaphy S, Gait MJ. 1991. RNA binding by the tat and rev  
649 proteins of HIV-1. *Biochimie* 73:9-16.
- 650 59. Gaudray G, Gachon F, Basbous J, Biard-Piechaczyk M, Devaux C, Mesnard JM. 2002.  
651 The complementary strand of the human T-cell leukemia virus type 1 RNA genome  
652 encodes a bZIP transcription factor that down-regulates viral transcription. *J Virol*  
653 76:12813-22.

- 654 60. Zhang W, Nisbet JW, Albrecht B, Ding W, Kashanchi F, Bartoe JT, Lairmore MD. 2001.  
655 Human T-lymphotropic virus type 1 p30(II) regulates gene transcription by binding  
656 CREB binding protein/p300. *J Virol* 75:9885-95.
- 657 61. Sørensen KD, Sørensen AB, Quintanilla-Martinez L, Kunder S, Schmidt J, Pedersen FS.  
658 2005. Distinct roles of enhancer nuclear factor 1 (NF1) sites in plasmacytoma and  
659 osteopetrosis induction by Akv1-99 murine leukemia virus. *Virology* 334:234-44.
- 660 62. Wu L. 2013. Cellular and Biochemical Mechanisms of the Retroviral Restriction Factor  
661 SAMHD1. *ISRN Biochem* 2013.
- 662 63. St Gelais C, de Silva S, Amie SM, Coleman CM, Hoy H, Hollenbaugh JA, Kim B, Wu L.  
663 2012. SAMHD1 restricts HIV-1 infection in dendritic cells (DCs) by dNTP depletion, but  
664 its expression in DCs and primary CD4+ T-lymphocytes cannot be upregulated by  
665 interferons. *Retrovirology* 9:105.
- 666 64. Arnold LH, Groom HC, Kunzelmann S, Schwefel D, Caswell SJ, Ordonez P, Mann MC,  
667 Rueschenbaum S, Goldstone DC, Pennell S, Howell SA, Stoye JP, Webb M, Taylor IA,  
668 Bishop KN. 2015. Phospho-dependent Regulation of SAMHD1 Oligomerisation Couples  
669 Catalysis and Restriction. *PLoS Pathog* 11:e1005194.
- 670 65. Tang C, Ji X, Wu L, Xiong Y. 2015. Impaired dNTPase activity of SAMHD1 by  
671 phosphomimetic mutation of Thr-592. *J Biol Chem* 290:26352-9.
- 672 66. Yan J, Kaur S, DeLucia M, Hao C, Mehrens J, Wang C, Golczak M, Palczewski K,  
673 Gronenborn AM, Ahn J, Skowronski J. 2013. Tetramerization of SAMHD1 is required  
674 for biological activity and inhibition of HIV infection. *J Biol Chem* 288:10406-17.
- 675 67. Li C, Wang HB, Kuang WD, Ren XX, Song ST, Zhu HZ, Li Q, Xu LR, Guo HJ, Wu L,  
676 Wang JH. 2017. Naf1 Regulates HIV-1 Latency by Suppressing Viral Promoter-Driven  
677 Gene Expression in Primary CD4+ T Cells. *J Virol* 91.
- 678 68. Thaker YR, Schneider H, Rudd CE. 2015. TCR and CD28 activate the transcription  
679 factor NF- $\kappa$ B in T-cells via distinct adaptor signaling complexes. *Immunol Lett* 163:113-  
680 9.
- 681 69. Schütze S, Wiegmann K, Machleidt T, Krönke M. 1995. TNF-induced activation of NF-  
682 kappa B. *Immunobiology* 193:193-203.
- 683 70. Wang JH, Janas AM, Olson WJ, KewalRamani VN, Wu L. 2007. CD4 coexpression  
684 regulates DC-SIGN-mediated transmission of human immunodeficiency virus type 1. *J*  
685 *Virol* 81:2497-507.
- 686 71. Panfil AR, Al-Saleem J, Howard CM, Mates JM, Kwiek JJ, Baiocchi RA, Green PL.  
687 2015. PRMT5 Is Upregulated in HTLV-1-Mediated T-Cell Transformation and Selective  
688 Inhibition Alters Viral Gene Expression and Infected Cell Survival. *Viruses* 8.
- 689 72. Dong C, Kwas C, Wu L. 2009. Transcriptional restriction of human immunodeficiency  
690 virus type 1 gene expression in undifferentiated primary monocytes. *J Virol* 83:3518-27.
- 691 73. Ji X, Tang C, Zhao Q, Wang W, Xiong Y. 2014. Structural basis of cellular dNTP  
692 regulation by SAMHD1. *Proc Natl Acad Sci U S A* 111:E4305-14.
- 693 74. Jones CP, Datta SA, Rein A, Rouzina I, Musier-Forsyth K. 2011. Matrix domain  
694 modulates HIV-1 Gag's nucleic acid chaperone activity via inositol phosphate binding. *J*  
695 *Virol* 85:1594-603.
- 696 75. Stewart-Maynard KM, Cruceanu M, Wang F, Vo MN, Gorelick RJ, Williams MC,  
697 Rouzina I, Musier-Forsyth K. 2008. Retroviral nucleocapsid proteins display  
698 nonequivalent levels of nucleic acid chaperone activity. *J Virol* 82:10129-42.

- 699 76. Livak KJ, Schmittgen TD. 2001. Analysis of relative gene expression data using real-  
700 time quantitative PCR and the  $2^{-\Delta\Delta C(T)}$  Method. *Methods* 25:402-8.
- 701 77. St Gelais C, Roger J, Wu L. 2015. Non-POU Domain-Containing Octamer-Binding  
702 Protein Negatively Regulates HIV-1 Infection in CD4(+) T Cells. *AIDS Res Hum*  
703 *Retroviruses* 31:806-16.  
704

705 **FIGURE LEGENDS**

706

707 **FIG 1. SAMHD1 suppresses HIV-1 LTR-driven luciferase expression. (A-E)** An HIV-1  
708 LTR-driven firefly luciferase (FF-Luc) construct was co-transfected with an empty vector (V) or  
709 increasing amounts of a plasmid encoding HA-tagged SAMHD1 (pSAMHD1) into HEK293T  
710 cells. Co-transfection of a construct encoding HSV TK-driven Renilla luciferase (Ren-Luc) was  
711 used as a control of transfection efficiency. **(A)** Overexpression of SAMHD1 was confirmed by  
712 immunoblotting. GAPDH was used as a loading control. Quantification of relative SAMHD1  
713 expression levels by densitometry was normalized to GAPDH, with the level of 1000 ng  
714 pSAMHD1 sample set as 1. Ren-luc activity **(B)** and mRNA **(C)**, and FF-luc activity **(D)** and  
715 mRNA **(E)** were measured at 24 h post-transfection. **(B)** Ren-luc activity was normalized to total  
716 protein concentration. **(D and E)** FF-luc activity and mRNA levels were normalized to Ren-luc  
717 activity and mRNA levels, with vector levels set as 1. **(B-E)** Error bars show standard deviation  
718 (SD) of at least three independent experiments as analyzed by one-way ANOVA with Dunnett's  
719 multiple comparison post test. \*\*\*\*,  $p \leq 0.0001$  compared to vector control cells. **(F-H)** FF-luc  
720 and Ren-luc constructs were expressed by nucleofection in THP-1 control (Ctrl) cells or  
721 SAMHD1 knockout (KO) cells. SAMHD1 KO was confirmed by immunoblotting, with GAPDH  
722 used as a loading control **(F)**. Luciferase activity was measured at 48 h post-transduction, and  
723 raw Ren-luc values were normalized to total protein **(G)**, and FF-luc activity normalized to Ren-  
724 luc activity **(H)**. \*\*,  $p \leq 0.01$  compared to control cells.

725

726 **FIG 2. SAMHD1 suppresses gene expression driven by the LTR from HIV-1 and HTLV-1,**  
727 **but not from MLV. (A-F)** HEK293T cells were transfected with an empty vector (V) or

728 increasing amounts of constructs expressing HA-tagged SAMHD1 and either an HIV-1 LTR-  
729 driven FF-luc construct with or without HIV-1 Tat-expressing plasmid (**A-B**), HTLV-1 LTR-  
730 driven FF-luc construct with or without HTLV-1 Tax-encoding plasmid (**C-D**), or MLV LTR-  
731 driven FF-luc construct (**E-F**). Overexpression of SAMHD1 was analyzed by immunoblotting  
732 (**A, C, E**) with GAPDH as a loading control. Co-transfection of Ren-luc was used as a control of  
733 transfection efficiency, with LTR-driven FF-luc activity normalized to Ren-luc activity. (**B, D,**  
734 **F**). Luciferase activity was determined 24 h post transfection. Error bars show standard error  
735 mean (SEM) of three (HIV-luc +/- tat, HTLV-luc +tat) or two (HTLV-luc -tat, MLV-luc)  
736 independent experiments. Statistical analysis was performed by one-way ANOVA with  
737 Dunnett's multiple comparison post test. \*,  $p \leq 0.05$ , \*\*,  $p \leq 0.01$ , and \*\*\*\*,  $p \leq 0.0001$ , compared  
738 to vector (V) control cells.

739

740 **FIG 3. Nonphosphorylated and dNTPase-inactive SAMHD1 mutants have impaired**  
741 **suppression of HIV-1 LTR activity.** (**A-C**) An HIV-1 LTR-driven FF-luc construct was co-  
742 transfected with increasing amounts of plasmids encoding HA-tagged WT, nonphosphorylated  
743 T592A, or dNTPase-inactive HD/RN mutant SAMHD1 into HEK293T cells. Co-transfection of  
744 Ren-luc was used as a control of transfection efficiency. (**A**) SAMHD1 expression was  
745 confirmed by immunoblotting. GAPDH was used as a loading control. Quantification of relative  
746 SAMHD1 expression levels by densitometry was normalized to GAPDH. Relative Ren-luc units  
747 were normalized to total protein concentration (**B**), and relative FF-luc units were normalized to  
748 Ren-luc levels (**C**). Vector cell luciferase activity set as 1. Statistical analysis was performed by  
749 one-way ANOVA with Dunnett's multiple comparison post test. Error bars show SD of at least

750 three independent experiments. \*,  $p \leq 0.05$ , \*\*,  $p \leq 0.01$ , and \*\*\*\*,  $p \leq 0.0001$  compared to vector  
751 control cells.

752

753 **FIG 4. WT SAMHD1 impairs HIV-1 reactivation in latently infected J-Lat cells. (A, C)**

754 HA-tagged SAMHD1 WT or mutants, or an empty vector were stably expressed in J-Lat cells by  
755 lentiviral transduction. Quantification of relative SAMHD1 expression levels by densitometry  
756 was normalized to GAPDH. **(A-B)** The cells were treated with either 10 ng/mL TNF $\alpha$ , or 32 nM  
757 PMA with 1  $\mu$ M ionomycin (PMA+i). At 24 h post-treatment, the expression of SAMHD1 was  
758 detected by immunoblotting, with quantification of SAMHD1 expression by densitometry  
759 normalized to GAPDH levels **(A)**. The percentage of GFP-positive cells and the relative GFP  
760 mean fluorescence intensity (MFI) were determined by flow cytometry **(B)**. J-Lat cells  
761 expressing T592A and HD/RN mutants were treated with 1 $\times$  or 8 $\times$  PMA+i (1 $\times$  corresponds to 16  
762 nM PMA and 0.5  $\mu$ M ionomycin), with expression of SAMHD1 measured and quantified by  
763 immunoblotting **(C)**. Latency reversal, as measured by percentage of GFP-positive cell  
764 population and MFI of GFP-positive cells, was determined by flow cytometry **(D)**. Error bars in  
765 **(B and D)** represent SD from at least three independent experiments analyzed by two-way  
766 ANOVA and Dunnett's multiple comparisons test. \*\*,  $p \leq 0.01$ , \*\*\*,  $p \leq 0.001$ , and \*\*\*\*,  
767  $p \leq 0.0001$  (compared to vector cells in panels B and D).

768

769 **FIG 5. WT SAMHD1 binds to HIV-1 proviral DNA in latently infected J-Lat cells. (A-D)** J-

770 Lat cells were seeded in the presence of PMA+i for 24 h. To achieve similar expression levels of  
771 SAMHD1, WT SAMHD1-expressing cells were treated with 4 $\times$  PMA+i, while vector control,  
772 T592A-, and HD/RN-expressing cells were treated with 8 $\times$  PMA+i. SAMHD1 expression in

773 input and IP lysates was analyzed by immunoblotting and densitometry analysis **(A)**. Latency  
774 reversal, as measured by percentage of GFP-positive cell population and MFI of GFP-positive  
775 cells, was determined by flow cytometry **(B)**. Three independent experiments were analyzed by  
776 two-way ANOVA and Dunnett's multiple comparisons test, with error bars in **(B)** representing  
777 SEM. \*\*\*,  $p \leq 0.001$  compared to vector cells. **(C)** Diagram of the location of the qPCR  
778 amplicons. Quantitative PCR data were normalized to spliced GAPDH levels and presented as  
779 percent of input in SAMHD1-expressing cells over vector cells **(D)**. Error bars in **(D)** represent  
780 SEM from two independent experiments.

781  
782 **FIG 6. Specific binding of WT SAMHD1 to an HIV-1 LTR fragment *in vitro*. (A-D)** Results  
783 of FA binding assays for WT, T592A or HD/RN mutant SAMHD1 binding to a 90-mer fragment  
784 of the HIV-1 LTR in 50 mM, 100 mM, or 150 mM monovalent ions (25, 50, or 75 mM of each  
785 NaCl and KCl) **(A-C)**, respectively). Binding to a 90-mer scrambled DNA oligonucleotide was  
786 also tested at 50 mM monovalent ions (25 mM of each NaCl and KCl) **(D)**. Error bars indicate  
787 the SD from three independent experiments.

788  
789 **FIG 7. Endogenous SAMHD1 impairs HIV-1 reactivation in latently infected primary**  
790 **CD4<sup>+</sup> T-cells. (A)** Protocol summary. Naïve CD4<sup>+</sup> T-cells were isolated from PBMCs from three  
791 different healthy donors, activated by incubation with anti-CD3/CD28 antibody-coated beads,  
792 and transduced with a single-cycle HIV-1 containing a *GFP* reporter (HIV-GFP) to produce a  
793 primary T<sub>CM</sub> cell model of latency. After infection and culture to produce latently infected  
794 quiescent CD4<sup>+</sup> T-cells, transduction with either empty vector or lentiviral vectors containing  
795 SAMHD1-specific shRNA to knockdown of SAMHD1. SAMHD1 expression was measured by

796 immunoblotting and GAPDH was a loading control **(B)**. After stimulation of the cells with anti-  
797 CD3/CD28, HIV-1 reactivation was measured by flow cytometry. Relative changes in the GFP-  
798 positive cell population and MFI of GFP-positive cells were quantified **(C)**, with each line  
799 indicating the result from one donor. \*,  $p \leq 0.05$ .



800 TABLES

801

802 Table 1. PCR primer sequences

803

| PCR primers                   | DNA sequence (5' -3')                      |
|-------------------------------|--------------------------------------------|
| <i>ltr</i> F <sup>1</sup>     | CGAACAGGGACTTGAAAGC                        |
| <i>ltr</i> R <sup>1</sup>     | CATCTCTCTCCTTCTAGCCTC                      |
| <i>gag</i> F                  | CTAGAACGATTTCGCAGTTAATCCT                  |
| <i>gag</i> R                  | CTATCCTTTGATGCACACAATAGAG                  |
| <i>vpr</i> F                  | GCCGCTCTAGAACCATGGAACAAGCC<br>CCAGAAGACCAA |
| <i>vpr</i> R                  | GCCGCCGGTACCGGATCTACTGGCTC<br>CATTCTTGCT   |
| <i>rev</i> F                  | CGGCGACTGCCTTAGGCATC                       |
| <i>rev</i> R                  | CTCGGGATTGGGAGGTGGGTC                      |
| <i>gapdh</i> F                | GATGGCATGGACTGTGGTCATG                     |
| <i>gapdh</i> R                | TGGATATTGCCATCAATGACC                      |
| <i>gfp</i> F                  | ACGTAAACGGCCACAAGTTC                       |
| <i>gfp</i> R                  | AAGTCGTGCTGCTTCATGTG                       |
| <i>Ren-luc</i> <sup>2</sup> F | GAGCATCAAGATAAGATCAAAGCA                   |
| <i>Ren-luc</i> <sup>2</sup> R | CTTCACCTTTCTCTTTGAATGGTT                   |
| <i>FF-luc</i> <sup>3</sup> F  | GGTTGGCAGAAGCTATGAAAC                      |
| <i>FF-luc</i> <sup>3</sup> R  | CATTATAAATGTCGTTTCGCGGG                    |

804

805 <sup>1</sup>F, forward; R, reverse. <sup>2</sup>*Ren-luc*, *Renilla luciferase*; <sup>3</sup>*FF-Luc*, *firefly luciferase*;

806 **Table 2. Sequences of oligonucleotides used in anisotropy binding assays**

807

| Oligonucleotides (90-mer) | DNA sequence (5' -3'), 5'-6-FAM-labeled                                                            |
|---------------------------|----------------------------------------------------------------------------------------------------|
| <i>HIV-1 LTR</i>          | AGCAGTGGCGCCCGAACAGGGACTTGAAAG<br>CGAAAGTAAAGCCAGAGGAGATCTCTCGAC<br>GCAGGACTCGGCTTGCTGAAGCGCGCACGG |
| Scrambled DNA             | ACTAGCTCAAGCGGGGGACACCCAGGTGTC<br>TCCAACAGTCCGTAGATCGGACGGAGAAGA<br>GGGGACCCCGCTAATGAGCGTGAGCAGAGA |

808

## Figure 1

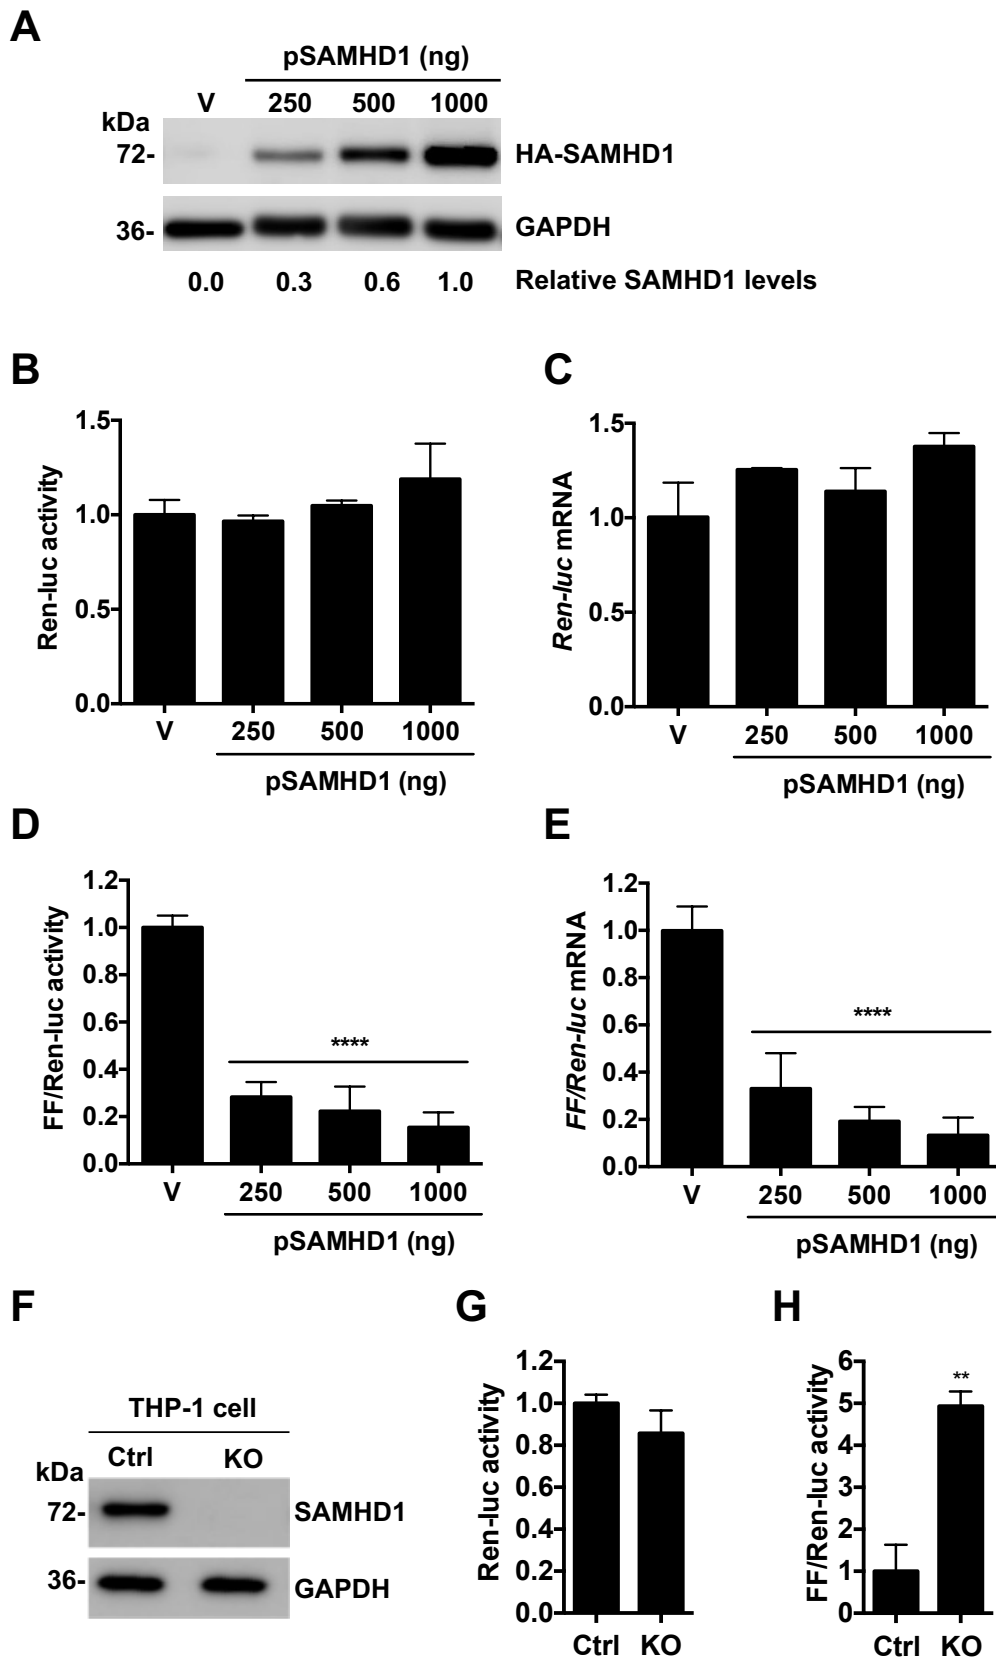

## Figure 2

**A**

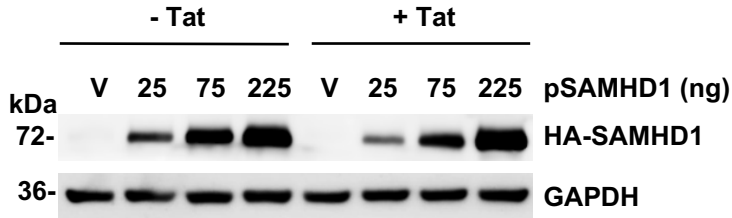

**B**

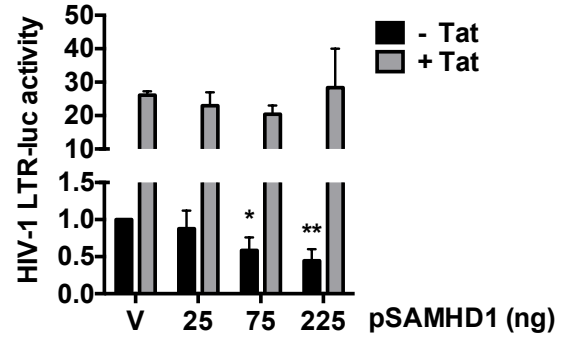

**C**

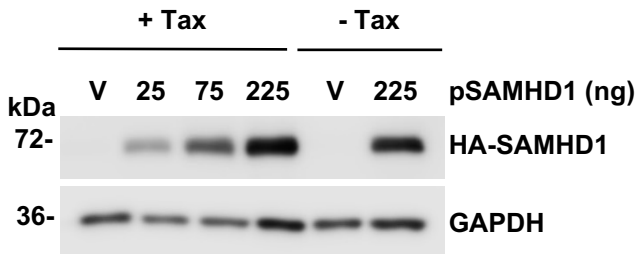

**D**

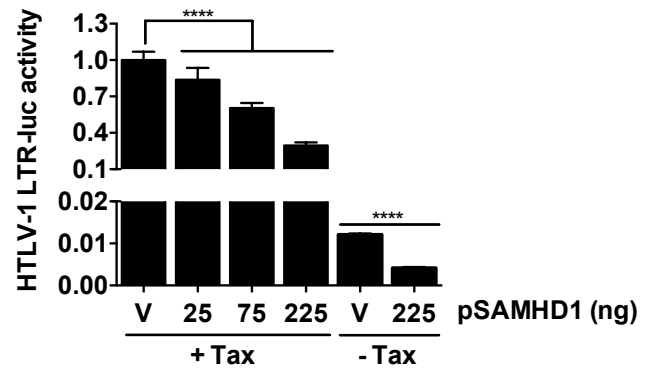

**E**

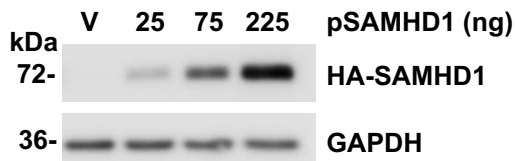

**F**

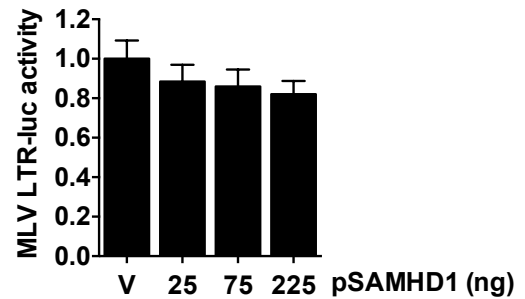



## Figure 4

**A**

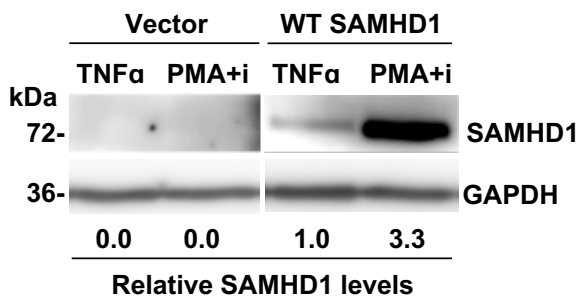

**B**

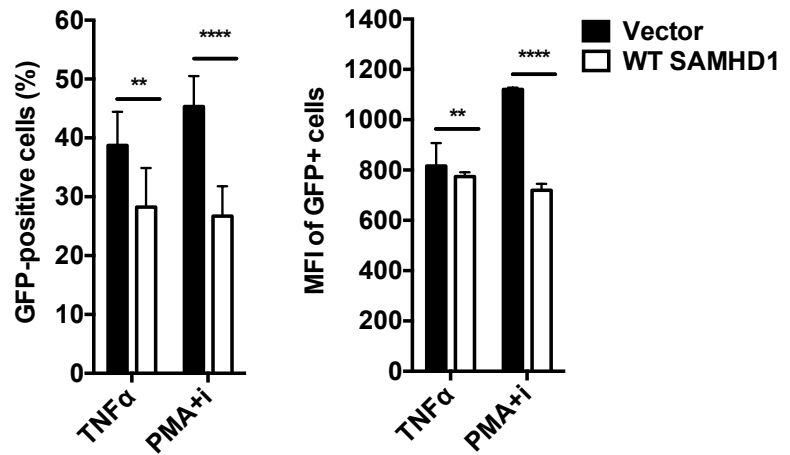

**C**

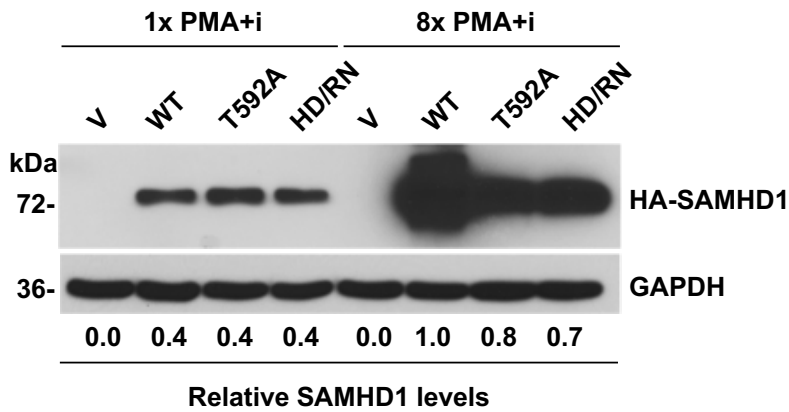

**D**

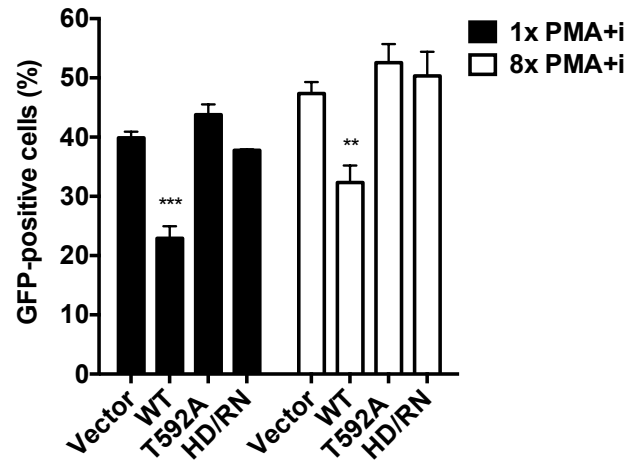

## Figure 5

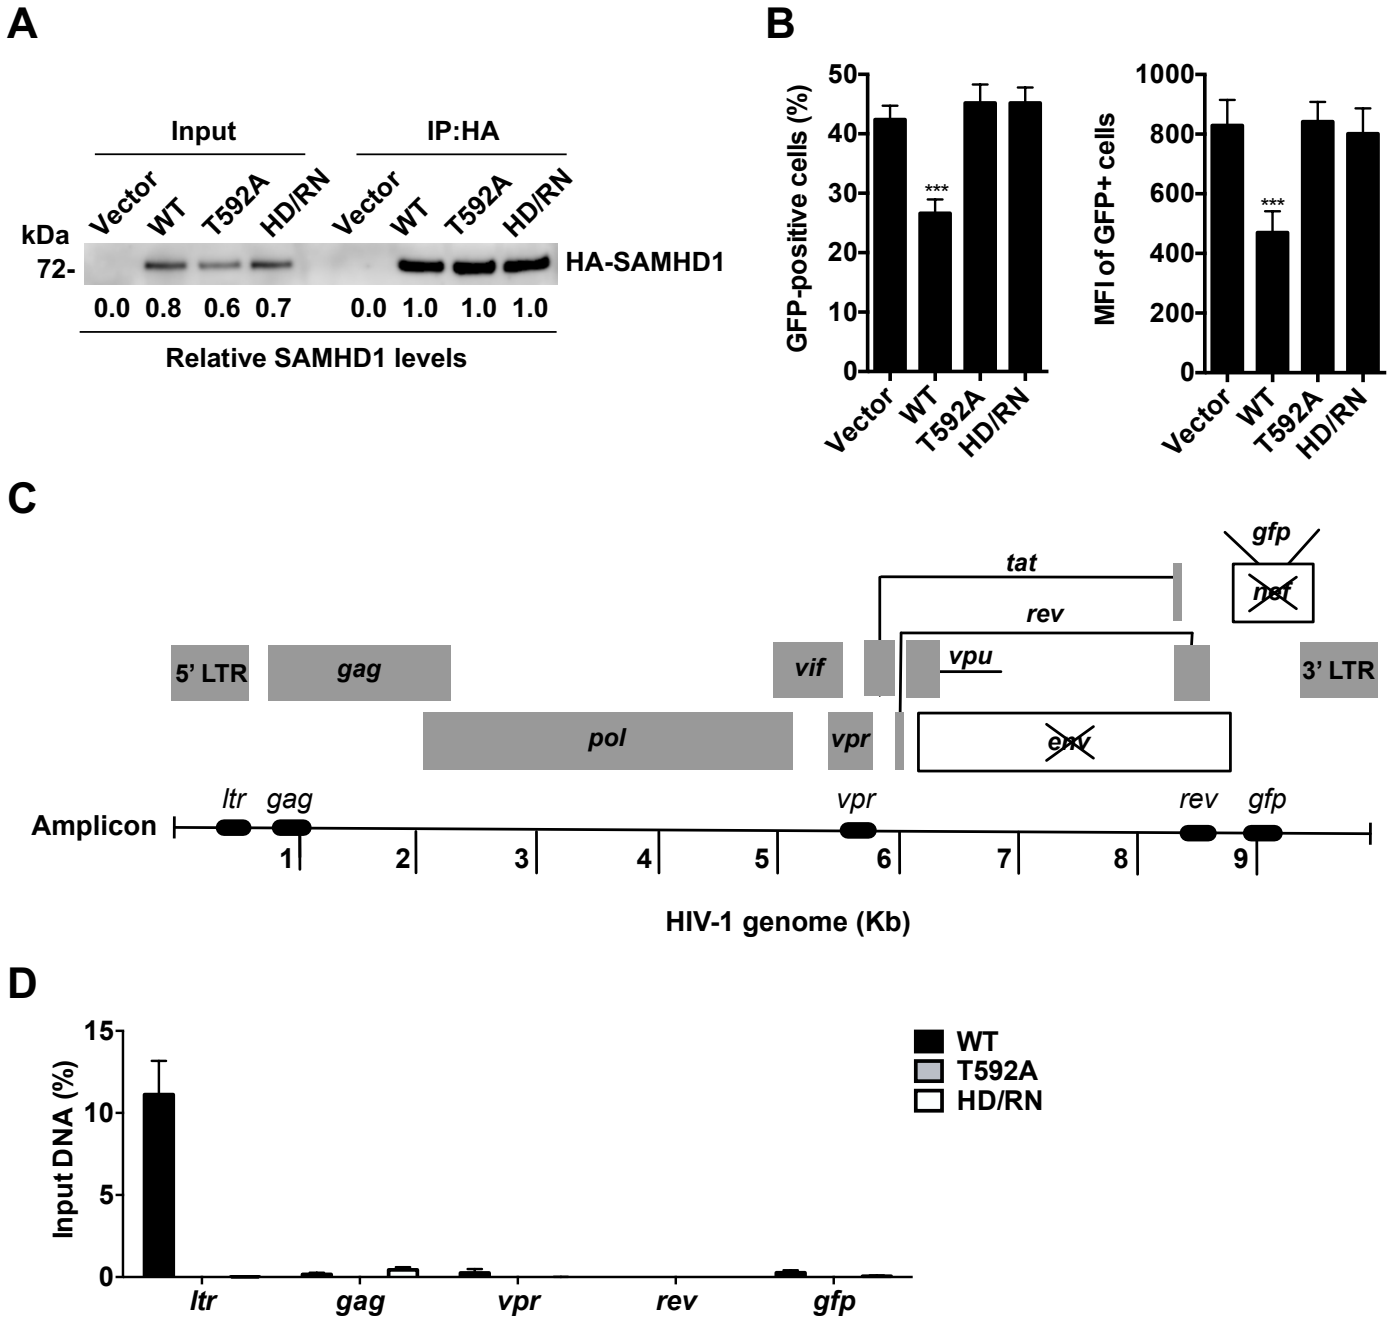

Figure 6

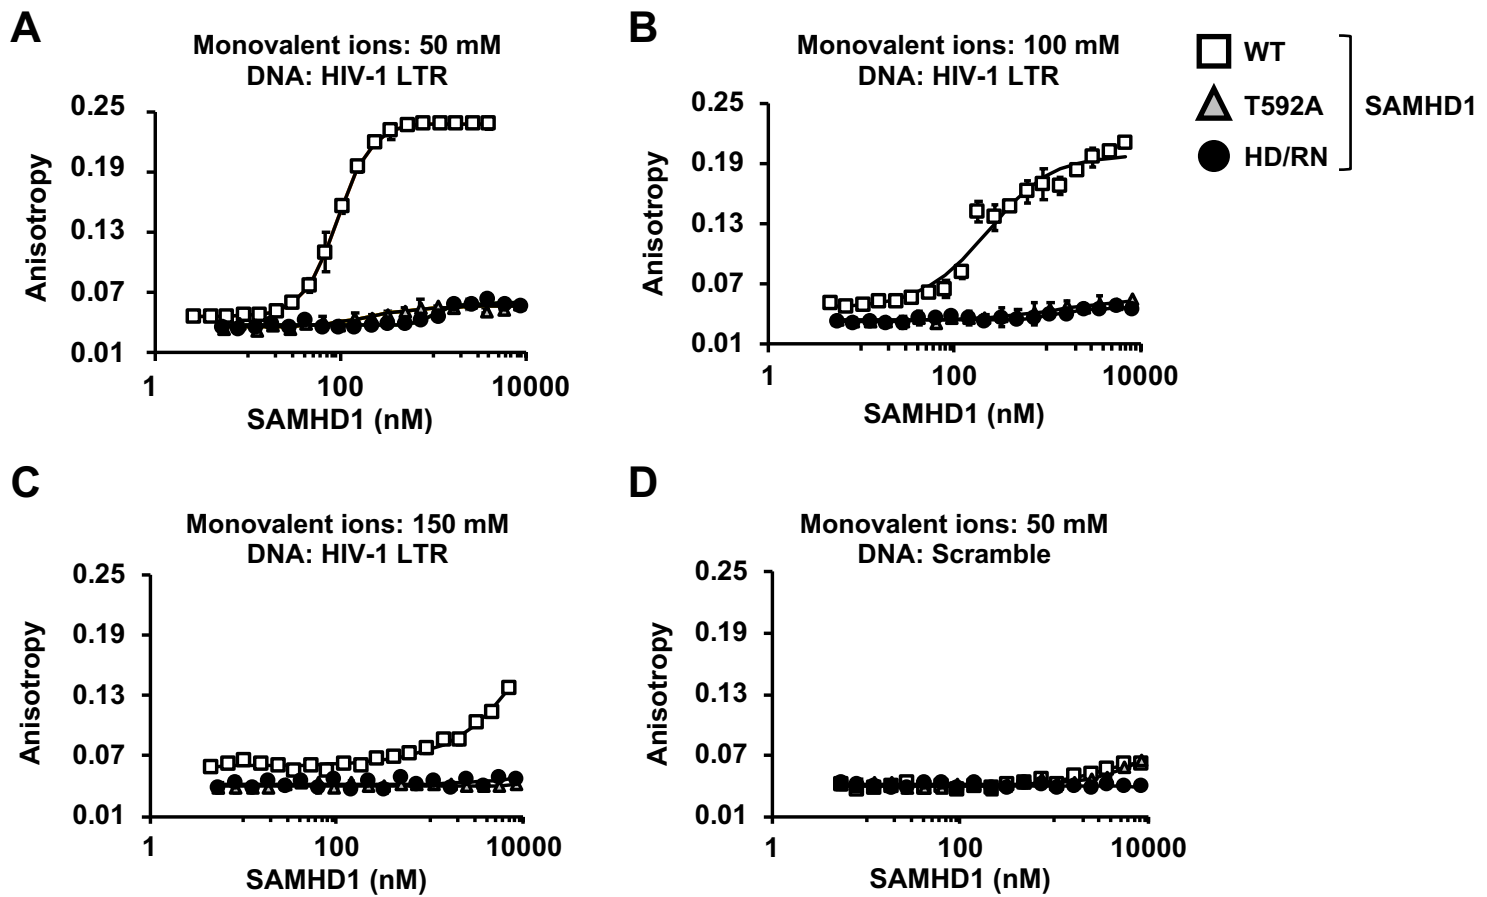



## Figure 7

**A**

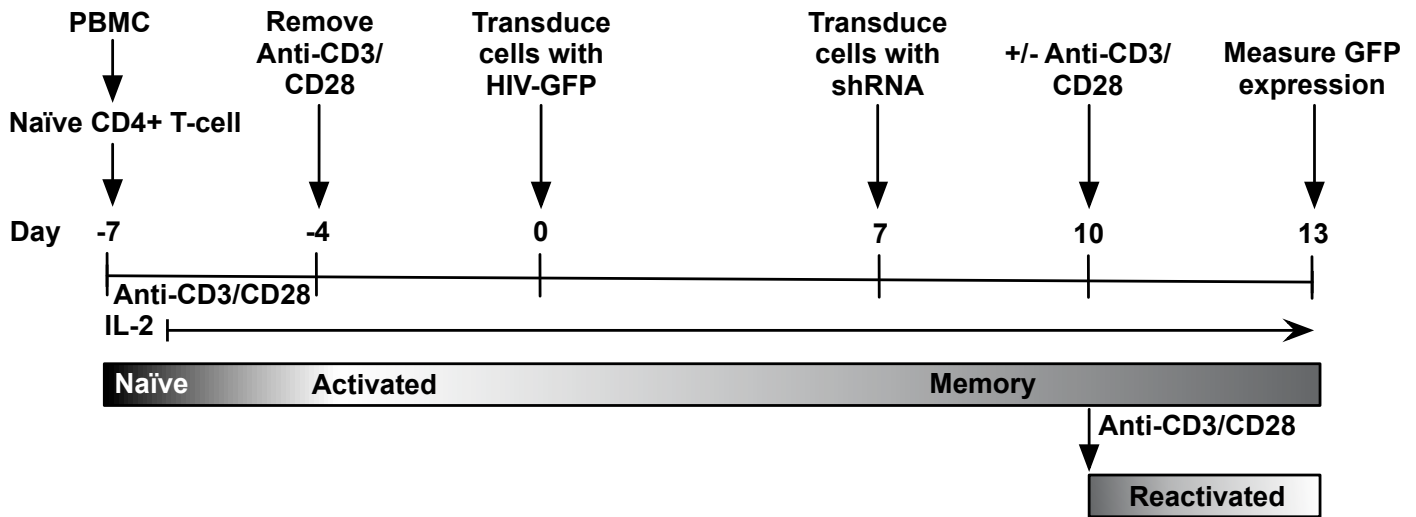

**B**

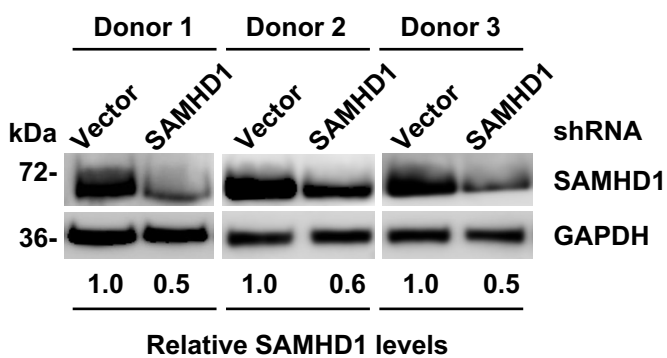

**C**

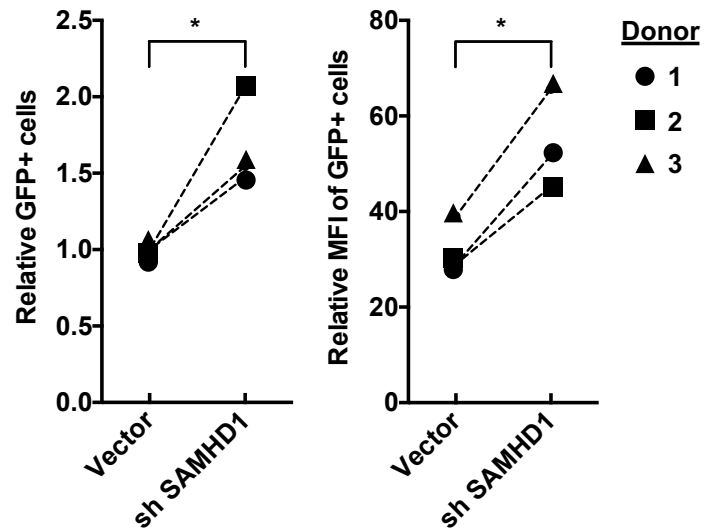

Source: https://www.biorxiv.org/content/10.1101/270843v1.full.pdf
